# 1 Zika Fetal Neuropathogenesis: Etiology of a Viral Syndrome

2

3 Zachary A. Klase<sup>1</sup>, Svetlana Khakhina<sup>1</sup>, Adriano De Bernardi Schneider<sup>2</sup>, Michael V Callahan<sup>3</sup>, Jill  
4 Glasspool-Malone<sup>4,5</sup>, and Robert Malone<sup>4,5\*</sup>

5 <sup>1</sup>Department of Biological Sciences, University of the Sciences, Philadelphia, PA, USA

6 <sup>2</sup>Department of Bioinformatics and Genomics, University of North Carolina at Charlotte, Charlotte, NC,  
7 USA

8 <sup>3</sup>Department of Medicine, Division of Infectious Diseases, Massachusetts General Hospital, Boston,  
9 Massachusetts, USA

10 <sup>4</sup>Atheric Pharmaceutical, Scottsville, VA, USA

11 <sup>5</sup>Class of 2016, Harvard Medical School Global Clinical Scholars Research Training Program, Boston,  
12 Massachusetts, USA

13 \*Corresponding author email [RWMaloneMD@gmail.com](mailto:RWMaloneMD@gmail.com)

## 14 Abstract:

15 The ongoing Zika Virus epidemic in the Americas, and the observed association with both fetal  
16 abnormalities (primary microcephaly) and adult autoimmune pathology (Guillain-Barré syndrome) has  
17 brought attention to this neglected pathogen. While initial case studies generated significant interest in  
18 the Zika virus outbreak, larger prospective epidemiology and basic virology studies examining the  
19 mechanisms of Zika viral infection and associated pathophysiology are only now starting to be published.  
20 In this review, we analyze Zika fetal neuropathogenesis from a comparative pathology perspective, using  
21 the historic metaphor of "TORCH" viral pathogenesis to provide context. By drawing parallels to other  
22 viral infections of the fetus, we identify common themes and mechanisms that may illuminate the  
23 observed pathology. The existing data on the susceptibility of various cells to both Zika and other  
24 flavivirus infections are summarized. Finally, we highlight relevant aspects of the known molecular  
25 mechanisms of flavivirus replication.

## 26 Key Learning Points:

- 27 1. Viral TORCH pathogens reveal common patterns of fetal pathophysiology and vertical  
28 transmission which are relevant to Zika Virus fetal neuropathogenesis.

- 29           2. The teratogenic effects of Zika Virus infection during the first trimester may involve infection of  
30           the trophoblast, viral translocation across the placenta, migration of infected cells resulting in  
31           embryonic infection, or indirect effects associated with high levels of inflammatory cytokines  
32           produced by infected placenta.
- 33           3. Pre-existing maternal non-neutralizing antibody to Zika virus may enhance the probability of  
34           infection or more severe disease in the fetus.
- 35           4. AXL has been identified as a major receptor for Zika Virus.
- 36           5. Zika virus activation of Toll Like Receptor 3 (TLR-3) pathways in central nervous system cells may  
37           trigger apoptosis and attenuate neurogenesis, directly contributing to fetal neuropathology.
- 38           6. Flaviviruses subvert host autophagy and noncoding RNA regulatory pathways.
- 39           7. Recognition of viral sequences by regulatory RNA binding proteins such as Musashi may have a  
40           role in Zika pathogenesis and host tissue tropism.
- 41           8. Evidence from other TORCH viral pathogen studies indicate multiple plausible hypotheses for  
42           transplacental infection by Zika virus during the second or third trimester, including transcytosis  
43           of non-neutralizing antibody-coated Zika virus complexes.

#### 44   Key References:

- 45   Adibi JJ, Marques ET Jr, Cartus A, Beigi RH. Teratogenic effects of the Zika virus and the role of the  
46   placenta. *Lancet* 2016; 387: 1587–90 (Hypothesis)
- 47   Adams Waldorf KM, McAdams RM. Influence of infection during pregnancy on fetal development.  
48   *Reproduction*. 2013 Oct 1;146(5) (Review)
- 49   Hamel R, Dejarnac O, Wichit S, Ekchariyawat P, Neyret A, Luplertlop N, et al. Biology of Zika Virus  
50   Infection in Human Skin Cells. *J Virol*. 2015;89(17):8880–96.

- 51 Mlakar J, Korva M, Tul N, Popović M, Poljšak-Prijatelj M, Mraz J, et al. Zika Virus Associated with  
52 Microcephaly. *N Engl J Med*. 2016 Feb 10.
- 53 Paul LM, Carlin ER, Jenkins MM, Tan AL, Barcellona CM, Nicholson CO, Trautmann L, Michael SF, Isern S.  
54 Dengue Virus Antibodies Enhance Zika Virus Infection. bioRxiv doi: <http://dx.doi.org/10.1101/050112>
- 55 Crow YJ, Manel N. Aicardi-Goutieres syndrome and the type I interferonopathies. *Nat Rev Immunol*.  
56 2015;15(7):429-40.
- 57 Tonduti D, Orcesi S, Jenkinson EM, Dorboz I, Renaldo F, Panteghini C, et al. Clinical, radiological and  
58 possible pathological overlap of cystic leukoencephalopathy without megalencephaly and Aicardi-  
59 Goutieres syndrome. *Eur J Paediatr Neurol*. 2016.
- 60 Cipolat Mis MS, Brajkovic S, Frattini E, Di Fonzo A, Corti S. Autophagy in motor neuron disease: Key  
61 pathogenetic mechanisms and therapeutic targets. *Molecular and Cellular Neurosciences*. 2016;72:84-  
62 90.
- 63 Dang J, Tiwari SK, Lichinchi G, Qin Y, Patil VS, Eroshkin AM, Rana TM. Zika Virus Depletes Neural  
64 Progenitors in Human Cerebral Organoids through Activation of the Innate Immune Receptor TLR3. *Cell*  
65 *Stem Cell*. 2016: 19: 1–8.
- 66 Vianna FS, Schuler-Faccini L, Leite JC, de Sousa SH, da Costa LM, Dias MF, et al. Recognition of the  
67 phenotype of thalidomide embryopathy in countries endemic for leprosy: new cases and review of the  
68 main dysmorphological findings. *Clin Dysmorphol*. 2013;22(2):59-63.

69 Zika Virus (ZIKV), a mosquito vectored flavivirus, was first isolated in 1947 from a sentinel research  
70 monkey caged in the Zika forest canopy within Uganda (1, 2). Soon after discovery, ZIKV was observed  
71 to infect humans (3). Travel, shipping, and the worldwide distribution of human hosts and mosquito  
72 vectors (including *Aedes aegypti* and other *Aedes* species) has facilitated a global radiation of Zika viral  
73 infection (4). More recently, introduction of ZIKV into naïve human populations has yielded rapidly  
74 spreading outbreaks in various Pacific island clusters (Cook Island, Easter Island, French Polynesia and  
75 Micronesia) and the ongoing epidemic in the Americas which may have originated in Haiti (5), and has  
76 subsequently spread throughout Brazil, the Caribbean, and worldwide via travelers visiting affected  
77 regions (6, 7). In ZIKV endemic regions such as continental Africa and Asia, there is epidemiologic  
78 support for the hypothesis that people are exposed to ZIKV during childhood and thereby develop  
79 immunity prior to puberty in both males and females. Introduction of ZIKV into dense immunologically  
80 naïve populations has facilitated rapid viral evolution, including conserved modifications consistent with  
81 possible adaptation to a human host (8, 9). Most pertinent to the current concern about ZIKV is the  
82 infection of pregnant women who are immunologically naïve to ZIKV, intrauterine infection of their  
83 babies, and associated increased risk of congenital malformations consistent with other fetal pathogens  
84 such as those historically referred to by the TORCH acronym (**T**oxoplasmosis, **O**ther (HIV, Syphilis,  
85 Varicella Zoster Virus (VZV) etc.), **R**ubella, **C**ytomegalovirus (CMV) and **H**erpes simplex virus-2 (HSV)).  
86 ZIKV fetal syndrome resembles but is more severe than that observed with many other intrauterine viral  
87 infections. Typical presentation includes multiple defects; microcephaly, facial disproportionality, cutis  
88 gyrata, hypertonia/spasticity, hyperreflexia, and irritability; abnormal neurologic image findings include  
89 coarse and anarchic calcifications mainly involving the subcortical cortical transition and the basal  
90 ganglia, ventriculomegaly secondary to the lack of brain tissue, and lissencephaly (7, 10-13). This  
91 alarming and consistent clinical presentation provoked a rapid regional mobilization of public health  
92 experts in Pernambuco (in the Northeast of Brazil). Investigation soon revealed a correlation between

93 ZIKV infection and the unusually high rate of infant microcephaly observed at the heart of the outbreak  
94 in Recife, Pernambuco. The striking features of ZIKV fetal syndrome may have gone unrecognized  
95 during prior outbreaks in the Pacific islands, or may involve regional confounding variables or risk  
96 cofactors present in Brazil such as prior exposure to Dengue virus (14, 15). The current pathology may  
97 also be consequent to recent viral mutations, such as observed changes in the prM protein of the  
98 Brazilian ZIKV strains (8, 16, 17). It has been demonstrated that ZIKV can infect human induced  
99 pluripotent stem cell -derived neural progenitor cells as well as human neurospheres and brain  
100 organoids in vitro, resulting in dysregulation of cell-cycle-related pathways and increased cell death (18-  
101 21). While the etiology remains unconfirmed, there appears to be a shift in the spectrum and incidence  
102 of birth defects between the latter stage of the French Polynesian outbreak (22) and what is now being  
103 observed in Recife, Rio, and throughout northern Brazil and surrounding regions (23, 24). In general, the  
104 combination of epidemiologic association and experimental research results strongly support a causal  
105 relationship between intrauterine ZIKV infection and fetal primary microcephaly.

106 Historically, human infection with ZIKV has presented in adults and young children as a mild, self-  
107 limiting, non-life threatening infection with clinical symptoms appearing in 20% of infected patients, and  
108 up to 80% being clinically asymptomatic during initial infection. Symptoms typically persist an average  
109 of 4 to 5 days to approximately one week from initial onset of headache and fever. Key major symptoms  
110 following retro-orbital and frontal headache and fever include a less consistent presentations of malaise,  
111 arthalgias, conjunctivitis, and pruritic maculopapular rash. More severe causes include escalation of the  
112 symptoms above, as well as nausea, vomiting and GI distress (4). The most recent assessment of clinical  
113 signs and symptoms of acute Zika virus infection observed in Puerto Rico includes rash (74%), myalgia  
114 (68%), headache (63%), fever (63%), arthralgia (63%), eye pain (51%), chills (50%), sore throat (34%),  
115 petechiae (31%), conjunctivitis (20%), nausea/vomiting (18%), and diarrhea (17%) (25). Based on blood  
116 bank screens, viremia can begin up to 10 days before onset of symptoms (26), and the modest plasma

117 viral titers observed often clear within two days of presentation with clinical symptoms, similar to what  
118 is observed with Dengue (27). At present, definitive diagnosis requires a polymerase chain reaction  
119 (PCR)-based test, and development of a rapid serologic diagnostic test is complicated by antibody cross-  
120 reactivity with other co-circulating arboviruses (28, 29). Historic serologic surveillance studies have  
121 been compromised by acute Zika infection induction of high titers of anti-dengue and even anti-  
122 chikungunya convalescent IgG levels, routinely at titers above 1:1280 (30, 31).

123 Current best estimates for the basic reproductive ratio ( $R_0$ ) for ZIKV varies between 1.2 and 6.6 (32-34),  
124 with seroconversion rate being approximately 70%, upon achieving maximal herd immunity. This  
125 limitation on further infection within a naïve population is typically achieved within four to eighteen  
126 months of initial introduction (35, 36). Acute motor axonal neuropathy-type Guillain-Barré syndrome  
127 (GBS) occurred at a rate of 1 in 5,000 cases of ZIKV during the outbreak in French Polynesia (15); the rate  
128 for GBS and all combined neurologic disease in the Americas may be as high as 1 in 100 cases (25). A  
129 clear temporal relationship between the peak of Zika virus infection in a susceptible population and a  
130 peak of GBS incidence following five to nine weeks later has been demonstrated, consistent with an  
131 autoimmune-mediated (rather than direct viral infectious neuropathy) pathologic mechanism (37).  
132 Interim analysis of an ongoing prospective case study of ZIKV -infected pregnancies indicates a birth  
133 defect rate of circa 29% (23). For the sake of illustration, the potential impact of these epidemiologic  
134 estimates on the anticipated 2017-2018 Puerto Rico birth cohort is summarized in Figure 1.

135 **Figure 1: Projected teratogenic impact of maternal ZIKV infection on 2017-2018 birth cohort, Puerto**  
136 **Rico.** For illustration purposes, the potential impact of unencumbered ZIKV spread through Puerto Rico  
137 on the cumulative one-year incidence of ZIKV-associated birth defects has been estimated and  
138 graphically summarized. Birth defect rate is based on preliminary data involving defects visible by *in*  
139 *utero* ultrasound examination from Brazilian (Rio) prospective pregnancy cohort study (23). Final  
140 seroconversion rate of 70% is based on seroconversion observed with prior island outbreaks in Yap and  
141 French Polynesia (35, 36). Annual birth cohort for Puerto Rico is approximated as 36,000 infants, a  
142 number which presumes that the incidence of pregnancy is not impacted by anticipated risk of ZIKV  
143 infection or public health policy recommendations. Total birth defect rate associated with intrauterine  
144 ZIKV infection in Northern and Central Brazil is currently not determined, and may exceed 30% of all  
145 Zika-infected pregnancies.

146  
147 In the current outbreak in the Americas, there is evidence for sexual transmission of the virus (38-41).  
148 While ZIKV RNA can be detected in breast milk, urine, semen and sputum from infected individuals (42),  
149 replication competent virus has been most readily cultured from semen samples. Semen ZIKV RNA  
150 levels may be up to 100,000 times higher than corresponding plasma levels (43). Preferential ZIKV  
151 replication in testes has been hypothesized. ZIKV is shed in semen for an extended period, and the  
152 average duration of shedding has yet to be determined (43). The stability of ZIKV in aqueous  
153 suspension, on surfaces or as fomites is unknown, but other flaviviruses can persist under various  
154 ambient conditions for extended periods (44-48). Zika virus sequences have been difficult to detect in  
155 trapped mosquitoes from outbreak areas, but have recently been recovered from *Aedes albopictus*  
156 mosquitoes by the Laboratory of the Institute of Epidemiological Diagnosis and Reference (InDRE),  
157 which functions as part of the Mexico Epidemiological Surveillance System (SINAVE) (49). ZIKV is more  
158 stable than Dengue virus (16), and so it cannot be assumed that sexual transmission is the only means of  
159 direct human to human infection. Sequence comparisons of ZIKV isolates indicate significant genetic  
160 differences between historic samples obtained from mosquito species and more modern isolates from  
161 human sources, including human samples obtained during the current outbreak in the Americas (8, 9).  
162 Any clinical significance associated with these viral genetic changes has yet to be elucidated.  
163 The apparent teratogenic effects of ZIKV infection have turned what was once considered a relatively  
164 benign pathogen into a subject of great social and scientific concern. Detection of ZIKV RNA and  
165 particles in amniotic fluid and fetal brain obtained from the products of conception strongly suggest that  
166 the virus is capable of directly infecting fetal tissue (12, 13). When considering the vast array of human  
167 pathogens, the probability of a mother passing an infection to her developing fetus is relatively rare.  
168 However, examples of pathogens consistently capable of vertical intrauterine transmission do exist, and  
169 can be associated with teratogenic effects. These viral diseases involving intrauterine infection may

170 illuminate and inform research into the possible mechanisms by which ZIKV may induce fetal  
171 neuropathology as well as other birth defects, and may facilitate development of public health risk  
172 mitigation strategies and potential treatments.

### 173 TORCH Viral Pathogens

174 Teratogenic infectious agents that are vertically transmitted from mother to infant during pregnancy,  
175 childbirth or breastfeeding have traditionally been classified as TORCH pathogens. For the purpose of  
176 this review we will focus on the classical viral TORCH pathogens: Rubella, CMV, HSV and VZV. These  
177 viruses can cross the placenta and cause congenital defects including, but not limited to, microcephaly,  
178 growth and mental retardation, heart disease, hearing loss and blindness (50-52). Years of scientific  
179 research concerning TORCH pathogen infection and teratogenicity have yet to identify therapeutic  
180 interventions which reduce occurrence of serious medical sequela and miscarriages for most of these  
181 viruses. Current preventative measures are limited to vaccination and avoiding viral exposure, or dosing  
182 with acyclovir for HSV (53). These approaches have limitations, and are not globally available. The most  
183 extensive fetal damage associated with viral TORCH infections typically takes place when the mother is  
184 infected during first eight weeks of the pregnancy, during which time the central nervous system (CNS)  
185 of the developing fetus is actively forming. With most viral TORCH pathogens, birth defect risk and  
186 severity is significantly reduced when infection occurs after seventeen weeks of gestation (54). Often  
187 first trimester infections result in miscarriages. Not all fetal congenital abnormalities manifest clinically  
188 at birth, and may present later in a child's development. As summarized in Table 1, presence of  
189 congenital defects at birth is typically linked to TORCH infection at earlier stages of gestation.

190 **Table 1: Selected Viral TORCH pathogens and associated morbidity.** After (54).

| <b>Viral TORCH Pathogen</b> | <b>Symptoms</b> | <b>First or Second Trimester Teratogen</b> | <b>Third Trimester Teratogen</b> | <b>Primary microcephaly</b> | <b>Spontaneous abortion or fetal death</b> |
|-----------------------------|-----------------|--------------------------------------------|----------------------------------|-----------------------------|--------------------------------------------|
|-----------------------------|-----------------|--------------------------------------------|----------------------------------|-----------------------------|--------------------------------------------|



|                                            |                                                                                                                                                                                                     |   |   |     |   |
|--------------------------------------------|-----------------------------------------------------------------------------------------------------------------------------------------------------------------------------------------------------|---|---|-----|---|
| <b>Rubella virus (German measles)</b>      | Defects in multiple organ systems including the ophthalmic (cataracts and microphthalmia), cardiac, neurological (deafness, mental retardation), and increased risk of type 1 diabetes in childhood | + | - | +   | + |
| <b>Cytomegalovirus</b>                     | Mental retardation, sensorineural hearing loss, jaundice, hepatosplenomegaly, petechiae, preterm birth, preeclampsia, and fetal growth restriction                                                  | + | - | +   | + |
| <b>Herpes simplex virus</b>                | Encephalitis, sepsis, cataracts, pneumonitis, myocarditis, hepatosplenomegaly, chorioretinitis, encephalitis, and mental retardation                                                                | + | + | +   | + |
| <b>Varicella zoster virus (chickenpox)</b> | Skin lesions, neurological and eye defects, limb hypoplasia, fetal growth restriction, and defects of multiple organ systems                                                                        | + | - | +/- | + |
| <b>Zika virus</b>                          | Microcephaly, facial disproportionality, cutis gyrate, hypertonia/spasticity, hyperreflexia, and irritability; abnormal neuroimages include calcifications, ventriculomegaly, and lissencephaly     | + | + | +   | + |

191

192 [Rubella \(German measles\)](#)

193 Prior epidemic outbreaks of Rubella and consequent associated birth defects may provide the best

194 illustration of the neonatal health risks of the current ZIKV outbreak in the Americas (55), although the

195 incidence of congenital rubella syndrome (CRS) associated with initial outbreaks in Rubella naïve

196 populations (56) appears to have been significantly less than what is being documented with ZIKV in  
197 Brazil (23). Rubella virus (RuV) is a member of the *Rubivirus* genus and *Togaviridae* family. The Rubella  
198 genome is encoded on a positive single stranded RNA (ssRNA), which is assembled on a protein scaffold  
199 and surrounded by lipid envelope. Host cell infection with RuV is driven by two glycoproteins, E1 and  
200 E2. Encoded in by the RuV genome, these glycoproteins assemble as heterodimers on the surface of the  
201 viral envelope and function similarly to the fusion proteins of flaviviruses (57, 58). E1 protein trimer  
202 directly inserts into host cell plasma membrane lipid bilayer, and using hairpin motion, brings the RuV  
203 closer to the cell surface to facilitate endocytosis (59, 60). The release of viral genome into the host cell  
204 occurs via low pH, and with the  $Ca^{2+}$  dependent E1 trimer conformational changes associated with  
205 maturing endocytic vesicles (61). Recent work has identified myelin oligodendrocyte glycoprotein as a  
206 receptor with affinity for RuV E1 protein (62). This discovery may provide a causal link between rubella  
207 virus and brain damage in fetuses with CRS. RuV infection of pregnant women has a pronounced  
208 teratogenic effect, especially during the first gestational trimester (59). Pathological and  
209 immunohistochemical analyses of aborted fetuses with CRS demonstrated wide spread necrosis to  
210 organs including eye, heart, brain and ear, and are associated with the presence of rubella virus in all  
211 tissues (63). In-vitro studies suggest that RuV infection inhibits normal growth and differentiation of  
212 human embryonic mesenchymal cells (64). RuV encoded replicase P90 protein has been shown to  
213 disrupt actin cytoskeleton formation by directly binding and inhibiting Cytron-K kinase, a cytokinesis  
214 regulatory protein (65). Inhibition of Cytron-K leads to cell cycle arrest and apoptosis in developing  
215 neuronal populations and retina of *in vitro* cultured mouse embryos (66). Additionally, Rubella virus  
216 infection of placenta and embryonic cells induces interferon expression, especially in the placenta (67).  
217 The most commonly observed outcomes of CRS are congenital cataracts (97.4%), inner ear  
218 abnormalities (73.9%), microcephaly (68.4%), and congenital heart defects (57.9%) (52, 63, 68, 69). If

219 the infection occurs during the first trimester, the rate of CRS is 80-90%. Odds of intrauterine  
220 development of extensive CRS dramatically decreases after 12 weeks of gestation (50).

### 221 Cytomegalovirus (CMV)

222 CMV is a member of the *Herpesviridae* family, *Betaherpesvirinae* subfamily and is also known as Human  
223 Herpesvirus 5 (HHV-5). Intrauterine CMV infection is linked to development of severe neurological  
224 handicaps, microcephaly (36%), intracranial calcifications, microgyria, eye defects and sensorineural  
225 hearing loss (68, 70-72). Congenital CMV infections are associated with radiographic findings which vary  
226 with gestational age at time of infection. Lissencephaly, including thin cerebral cortices, extremely  
227 diminished volume of white matter, delayed myelination, small cerebella, and very enlarged lateral  
228 ventricles have been correlated with CMV infection prior to eighteen weeks of gestational age, whereas  
229 those cases of congenital CMV infection which present with more normal gyral patterns (normal  
230 cerebral cortices, slightly diminished volume of white matter, delayed myelination, normal cerebella,  
231 and slightly enlarged lateral ventricles) are associated with third trimester infection (73, 74). These  
232 findings are similar to those observed with heritable disorders including cystic leukoencephalopathy  
233 without megalencephaly, Aicardi-Goutières syndrome, type 1 interferonopathies and RNASET2-related  
234 leukodystrophy (75, 76).

235 CMV is a double stranded DNA virus (dsDNA) with a complex envelope structure of 12 glycoproteins.

236 Due to this complexity CMV, can bind to a broad spectrum of cell surface receptors, and quickly  
237 becomes ubiquitous in the human host after initial infection (77). CMV glycoprotein gB and  
238 heterodimer gM/gN have affinity to heparan sulfate proteoglycans (HSPGs), which are abundantly  
239 present on the surface of most cell types (78, 79). Additionally, CMV has been shown to bind epidermal  
240 growth factor receptor (EGFR) and  $\beta$ 1 integrin coreceptors thereby facilitating proximity to the host cell  
241 membrane (80, 81).

242 CMV crosses host cell barriers via membrane fusion mediated by the gH/gL/gO and gB viral envelope  
243 glycoproteins (80, 82). CMV infection is mostly asymptomatic in immune competent adults, and forms a  
244 life-long latent infection. Primary CMV infection during pregnancy yields the highest risk of vertical  
245 transmission (32%) relative to virus re-activation in chronically infected mothers (1.4%) (83). CMV  
246 infection of the cytotrophoblast progenitor cells associated with floating villi in the placenta appears to  
247 elicit a shift in the Th1/Th2 cytokine balance of amniotic fluid and placental tissues, towards a Th1  
248 profile, by upregulation of pro-inflammatory cytokines like MCP-1 and TNF- $\alpha$  (84, 85). This shift has  
249 been hypothesized to directly induce defects in placental formation and congenital abnormalities.  
250 There is significant evidence supporting the hypothesis that CMV virions transit placental barriers to  
251 fetal infection by co-opting the neonatal Fc receptor-mediated transport pathway for IgG (transcytosis)  
252 (86). However, replication of CMV in uterine endothelial cells may be required for subsequent infection  
253 of cytotrophoblasts (87, 88).

#### 254 HSV (HSV-1 and HSV-2)

255 HSV is a dsDNA enveloped virus belonging to the *Herpesviridae* family. Similar to CMV, HSV has a large  
256 number of glycoproteins present on the surface of its viral envelope, and can bind to multiple host cell  
257 receptors (89). HSV infection leads to formation of oral (HSV-1) and genital (HSV-2) lesions in adults.  
258 HSV host cell entry requires viral glycoprotein (primarily gD) binding to heparan sulfate and HveA  
259 (Herpes Virus Entry Mediator (HVEM) receptor), HveB (nectin-2) or HveC (nectin-1) receptors on the  
260 host cell plasma membrane surface. HSV enters the host-cell via membrane fusion or endocytosis (89).  
261 HSV can enter the CNS of adults, and in rare cases has been associated with clinical encephalitis (90).  
262 HSV infects neuronal cells through the nectine-1 receptor, and can form a latent and immunologically  
263 privileged reservoir of infection in the brain (91).  
264 In contrast to CMV, cross-placental transition of HSV from mother to fetus is uncommon (92). Cells of  
265 the outer layer of the placenta do not express HveA, HveB or HveC, and cannot be infected by HSV (93).

266 Congenital HSV infection is very rare, and usually occurs when a serologically negative mother is  
267 exposed to the virus during the first trimester of pregnancy. Congenital HSV pathology includes multi-  
268 organ failure, liver necrosis, encephalitis, microcephaly (32%), hydrocephalus, chorioretinitis and skin  
269 lesions (94, 95). HSV infection of placenta-associated cells induces inflammation and necrosis of  
270 placental tissue (94). Neonatal HSV-2 infection during childbirth or HSV-1 infection during the first year  
271 of life is more common, and is associated with up to 40% mortality. Aggressive anti-HSV treatment of  
272 neonates with acyclovir often controls the virus at the cost of long-lasting health risks to the child (96).  
273 There is a higher risk for HSV infection of the infant during childbirth in mothers that acquired genital  
274 HSV during the last trimester (~50%), while peripartum HSV-2 reactivation is associated with less than  
275 1% of neonatal infections (96). This result suggests the role of maternal antibodies in protection of the  
276 child from HSV infection during birth. Congenital HSV infection is differentiated from perinatal infection  
277 by early onset (within 24h of birth) and increased severity of the symptoms (50). The relatively rare  
278 event of HSV microcephaly is exclusively associated with congenital infections (95).

### 279 VZV (Chickenpox)

280 Varicella Zoster Virus (VZV) is a dsDNA enveloped virus. It belongs to *Herpesviridae* family,  
281 *Alphaherpesviridae* subfamily. VZV and HSV belong to the same subfamily, and share many  
282 characteristics (97). Similar to HSV, VZV can cause encephalitis, and can also form latent viral reservoirs  
283 in the brain (90, 98). The VSV viral envelope glycoprotein gE is essential for infection. This protein binds  
284 the Insulin-Degrading Enzyme (IDE) receptor, and employs heparan sulfate to facilitate host cell  
285 infection (99). Congenital VZV is associated with a high neonatal mortality rate (30%). Primary VZV  
286 infection during the first 6 months of pregnancy is associated with a 25% risk of in-utero infection (51).  
287 Twelve percent of intrauterine infections will result in a range of birth defects including limb hypoplasia,  
288 microcephaly, hydrocephaly, mental retardation and cataracts (51), in many ways similar to the disease  
289 spectrum currently observed with Zika fetal syndrome.

## 290 Zika virus, a new viral TORCH pathogen

291 The list of TORCH viral pathogens is constantly expanding, and sufficient clinical data support adding  
292 ZIKV to the list. The exposure of a naïve population to a new virus which has historically been mosquito  
293 vectored, is sexually transmissible, and may be capable of direct human to human transmission by other  
294 means presents a greater challenge. With the emerging global threat of ZIKV infection to pregnant  
295 women, it is critical that we improve our understanding of the mechanism(s) of intrauterine infection,  
296 and of the medical management of subsequent neurologic disease.

297 Examination of the classic TORCH pathogens reveals some common themes, which can inform research  
298 concerning ZIKV fetal neuropathogenesis: these agents either infect the placenta, or infect specific  
299 tissues in the fetus linked to pathology. In some cases, specific molecular mechanisms that exacerbate  
300 the resulting pathology have been identified. Further exploration of cell surface receptors and placental  
301 permeability may assist with development of interventional prophylactics and therapeutics for pregnant  
302 women.

## 303 Zika Virus Infection of the Placenta and Fetal Brain

304 In order to successfully establish an infection in a target tissue, all viruses must go through the same  
305 basic steps: the virus must overcome local host defenses at the site of infection (both barrier and  
306 immunologic response), infect a cell that is both susceptible and permissive to producing infectious  
307 virions, and the infected cell must release sufficient numbers of infectious particles which are able to  
308 travel to the target tissue and again infect a susceptible cell. Analyzing what we know about ZIKV  
309 infection in terms of this model can shed light on the possible mechanisms by which ZIKV might cause  
310 fetal abnormalities after initial maternal infection.

311 There are many plausible alternative hypotheses for Zika virus-induced fetal neuropathogenesis (100).  
312 These alternatives generally fall into two categories; infection of fetal tissue by ZIKV, or transcytosis of  
313 other factors that are causative of Zika Fetal Syndrome. Infection of fetal tissue may involve transcytosis

314 of ZIKV from mother across the placenta or infection of the placenta itself. Either option may lead to  
315 dissemination of the virus in the fetus and subsequent infection of the developing brain. Infection of the  
316 placenta and resulting inflammatory response may indirectly alter neural development. Transcytosis of  
317 (yet to be defined) antigen-specific immunoglobulins or other maternal molecules related to the  
318 development of ZIKV GBS may directly harm the fetal brain without requiring viral replication in nervous  
319 tissue (15, 101, 102). ZIKV transfer and infection of the developing fetal brain may occur directly as free  
320 virus, as viral/non-neutralizing antibody complexes, or via infected Hofbauer or other migratory cells.  
321 Activation of TLR-3 by ZIKV binding to nervous tissue cells may directly induce damage without requiring  
322 viral replication (21). Placental infection by ZIKV triggering induction and release of inflammatory  
323 response-associated molecules may be sufficient to indirectly damage the fetal CNS (103-105). These  
324 possible mechanisms are not mutually exclusive, and may operate at different stages of fetal  
325 development.

326 The placenta represents a major barrier to fetal infection. This organ has evolved pathways for  
327 regulating the transport of materials, metabolites, oxygen and electrolytes, and both innate and  
328 adaptive immunologic effectors (particularly maternal immunoglobulin) between the mother and fetus.  
329 Soluble factors, oxygen and cells can all be selectively exchanged. Despite the relatively common event  
330 of infection of a pregnant woman by different viruses, transplacental passage of virus and intrauterine  
331 fetal infections are rare. This high degree of selectivity is largely due to a specialized outer placental  
332 layer; the syncytiotrophoblast, a large multinuclear body formed by the fusion of multiple cells into a  
333 syncytium during the second trimester of fetal development (106). This fusion into a single giant cell  
334 avoids the problems of maintaining intercellular junctions, which are sufficiently tight to prevent the  
335 unregulated movement of large molecules (and pathogens). In order for a virus to reach the fetus after  
336 this event, ZIKV must either have a mechanism to bypass the syncytiotrophoblast barrier, or must  
337 directly infect the placenta itself as has been observed with various viral TORCH pathogens. One

338 possible method for the passage of ZIKV across the placenta to the fetus is through the mechanism  
339 which facilitates unidirectional transmission of maternal antibodies to the amniotic fluid and developing  
340 embryo (107, 108). The neonatal Fc receptor (FcRn, or FCGRT) is proposed to be involved in the  
341 recognition of maternal IgG, and in uptake of these antibodies by the cells of the infant gut. In addition,  
342 neonatal Fc gamma receptor IIb2 molecules expressed in human villous endothelium (within the  
343 FCGR2B2 compartment) actively participate in endothelial transcytosis of maternal IgG (109, 110).  
344 RAB3D, a member of the RAS-related protein RAB family, appears to play a key role in regulating the  
345 activity of the FCGR2B2 organelle, and therefore may influence transport of either autoimmune-  
346 associated antibodies or antibody-coated ZIKV. Antibody mediated enhancement of infection has been  
347 reported for Dengue virus, a related flavivirus, as well as for ZIKV (14). For Dengue virus, antibodies  
348 raised against previous infection with a different serotype of virus may enhance subsequent infection in  
349 a dendritic cell-mediated fashion (111, 112). For ZIKV, in vitro studies have demonstrated enhancement  
350 of infectivity with serum from patients with serologic responses to Dengue virus (14). The high degree  
351 of cross-reactivity between antibodies elicited by co-circulating arboviruses present in Brazil and  
352 throughout the Caribbean may contribute to intrauterine ZIKV disease by facilitating infected dendritic  
353 cell transport or by direct transcytosis of non-neutralizing antibody-coated ZIKV virions (14).

354 Delivery of ZIKV by transcytosis of antibody bound virus does not appear to be compatible with the  
355 window of greatest vulnerability for Zika teratogenicity, the first trimester of pregnancy. The transport  
356 of maternal IgG across the placenta begins at week sixteen (113, 114); the levels of IgG in fetal  
357 circulation at gestational weeks 17-22 are relatively low (5-10% of maternal levels) and rise continually  
358 with levels reaching 50% at weeks 28-32, followed by an exponential increase in the final four weeks  
359 before delivery (115). A study of RNA levels of Fc receptors in the placenta confirms that transcytosis is  
360 likely to begin primarily in the second trimester (116). Functionally active placental FcRn expression has  
361 been detected at 20 weeks (117). By analogy, maternal autoimmune antibody which may be elicited by



362 ZIKV epitope mimics (ergo, GBS-associated antibodies) (118) are also unlikely to cross the placenta prior  
363 to the sixteenth gestational week. Many mothers of microcephalic children were infected with ZIKV  
364 before the tenth gestational week, and are likely to have cleared the virus well before sixteen weeks  
365 (29).

366 The timing of ZIKV infection relative to neonatal outcome may illuminate the mechanism of fetal  
367 infection. A recent preliminary report describes neuropathological aspects of fetal development in a  
368 cohort of Zika infected women (23). Most strikingly, fetal ultrasonography revealed abnormalities in  
369 twelve of the forty-two women who experienced ZIKV infection during pregnancy, as compared to none  
370 of the sixteen cohort-matched fetuses in Zika-negative women. Although the size of the cohort studied  
371 in this reported in this study was still low, they span a period of initial ZIKV exposure running from eight  
372 weeks to thirty-five weeks of gestation. The observations of microcephaly and severe cerebral  
373 pathology appear most commonly when the mother was infected with ZIKV at twelve weeks or earlier.  
374 Infection of the mother during the second or third trimester was reported to result in intrauterine  
375 growth restriction or, in two cases, fetal death. This pattern of timing supports the hypothesis that first  
376 trimester infection results in direct transmission of the virus to the fetal brain with subsequent viral  
377 replication, whereas later infection may involve activation of placental inflammatory responses. ZIKV  
378 infection of human cerebral organoids acts (at least in part) via TLR-3 to elicit a direct neural cell  
379 depletion which is partially abrogated by TLR-3 inhibition. TLR-3 activation by ZIKV resulted in  
380 alterations in expression of multiple genes associated with neuronal development, implying a  
381 mechanistic connection to disrupted neurogenesis (21).

382 The overall retardation of growth observed after second and third trimester exposure to ZIKV suggests  
383 that the virus may be exerting an indirect teratogenic effect by infecting the placenta rather than other  
384 fetal tissues during this period. A separate case study has recently identified infectious virus in the  
385 placenta of a fetus and detected resulting ongoing maternal ZIKV viremia (12), and this may include

386 placental Hofbauer cell infection and/or activation (105). This is in agreement with previously published  
387 work showing that the placenta can induce viral resistance in nearby cells (119). In contrast, a well-  
388 designed basic virology study has shown that placental cells from a full term pregnancy are resistant to  
389 ZIKV (120). However, no data currently exist concerning the susceptibility of early placental cells to ZIKV  
390 infection.

391 Another possible mode of fetal infection would be transmission of ZIKV-infected maternal cells across  
392 the placenta at any stage of pregnancy. If a motile cell (such as a dendritic or Hofbauer cell) was  
393 infected and then crossed the placenta or was able to transit maternal-placental blood vessels, it could  
394 carry virus to the fetus. A similar situation has been modeled in mice in which dendritic cells can carry  
395 intracellular pathogens across the placenta (121). There is some limited evidence for the presence of  
396 maternal cells in the lymph nodes of second trimester fetuses, but the mechanism by which this  
397 migration occurs is not well understood (122). Infected migratory maternal cells might also contribute  
398 to fetal neuropathology via proinflammatory cytokine release. Placental Hofbauer cells have been  
399 shown to be activated by TLR-3 and TLR-4 mediated pathways, and ZIKV has been shown to activate  
400 TLR-3 mediated responses in neuronal cells (21).

401 Teratogenicity and neuropathology associated with TORCH pathogen infection of the placenta is well  
402 documented (54), and ZIKV may also interfere with fetal development by this route (103). The  
403 pronounced elevation of a variety of inflammatory cytokines may trigger microglial activation with  
404 attendant damage to surrounding cells, including neurophils, but is usually associated with damage to a  
405 wide range of fetal organs and tissue (123). The disease spectrum associated with chorioamnionitis  
406 overlaps with many of the features of Zika fetal syndrome, and includes periventricular leukomalacia,  
407 intraventricular hemorrhage, cerebral palsy, and retinopathy of prematurity (124-128). While ZIKV may  
408 also elicit similar pathology by direct placental infection, the striking selectivity and consistency of  
409 central nervous system damage observed, combined with the unusually severe damage to developing

410 brain and the presence of ZIKV sequences in amniotic fluid and brain tissue, suggests some contribution  
411 of direct ZIKV infection of fetal CNS in the majority of cases.

### 412 [Expression of ZIKV receptors in placental and central nervous system tissues](#)

413 Early in embryonic development, direct infection of the placenta by ZIKV could provide a route of entry  
414 to fetal tissue. Productive infection of the trophoblast by the virus would allow newly produced virions  
415 to be passed inward to the fetus. A critical step to the productive infection of any target cell is the  
416 expression of the correct viral receptors on the cell surface.

417 Flaviviruses, such as Dengue Virus (DV), Japanese Encephalitis Virus (JEV) and West Nile Virus (WNV) are  
418 known to use cellular C-type lectin proteins as receptors (129). Expression of several members of this  
419 receptor family is high on cells of the myeloid lineage such as monocytes, macrophages and dendritic  
420 cells (130). Multiple studies provide evidence for the role of one specific lectin, dendritic-cell specific  
421 ICAM-3-grabbing nonintegrin (DC-SIGN), in the infection of flaviviruses (131-135). DC-SIGN is an  
422 essential host protein that is involved in pathogen capture and antigen presentation in dendritic cells.  
423 As a lectin, DC-SIGN recognizes carbohydrate structures on proteins. Any ZIKV transmitted to a human  
424 host after replication in the salivary gland of a mosquito vector will carry the glycosylation pattern  
425 produced in the cells of the insect host. When virus replicates in insect salivary glands, the glycosylation  
426 of the viral proteins involved in receptor binding will follow the pattern observed in insects (high-  
427 mannose glycans) and not the more complex pattern seen in mammalian glycoproteins (132, 136).  
428 Dendritic cells are capable of recognizing this difference and reacting to these non-host glycosylation  
429 patterns. This specificity and the presence of dendritic cells in the epidermis, and therefore in close  
430 proximity to the site of the mosquito bite, means that mosquito-vectored flaviviruses are likely to  
431 preferentially infect the dendritic cell as an initial target cell type. The probability of uptake and initial  
432 infection of host dendritic cells may be enhanced by the presence of pre-existing non-neutralizing  
433 antibody which binds ZIKV (14).

434 Although the initial stages of human ZIKV infection are not as extensively studied as infection with  
435 viruses such as Dengue, a study by Hamel *et al.* has identified multiple receptors involved in ZIKV entry  
436 to the target cell (137). This seminal work examined the involvement of known Dengue virus receptors  
437 in ZIKV infection. The results confirmed a role for DC-SIGN in mediating ZIKV entry, and also identified  
438 roles for two TAM receptor proteins, called Tyro3 and AXL, and a minor role for a protein called TIM-1.  
439 Tyro3 and AXL are tyrosine kinase receptors whose natural ligand are the vitamin-K dependent proteins  
440 growth-arrest specific gene 6 (Gas6) and Protein S. Armed with this list of receptors, it is possible to  
441 predict what specific cells in the placenta and CNS might be susceptible to ZIKV infection.

442 An analysis from the US Centers for Disease Control and Prevention (CDC) reported ZIKV RNA and  
443 proteins in tissues from newborns and from two miscarriages (138). Examination of the corresponding  
444 placentas showed pathology associated with viral infection. Direct ZIKV infection of the placenta is  
445 plausible, as the trophoblast layer has been shown to express the needed receptors, and a recent report  
446 has recovered infectious virus from the placenta (12). AXL expression has been detected in the  
447 trophoblast, and perturbations in Gas6 signaling through AXL have been shown to be associated with  
448 pre-eclampsia, suggesting a possible mechanism of pathology (139). Histology available through the  
449 Human Protein Atlas also confirms expression of AXL and Tyro3 throughout the trophoblast layer (140).  
450 Although the trophoblast does not appear to express DC-SIGN, tissue resident cells of the myeloid  
451 lineage will express this lectin. This provides a pathway by which the infected trophoblast might  
452 produce virus that will infect patrolling myeloid cells. Infected myeloid cells may allow production of  
453 greater quantities of virus (leading to viremia) or serve as a vector to traffic virus to other tissues. Proof  
454 of this second possibility requires the identification of ZIKV positive perivascular macrophages or  
455 microglia in brain tissue from abortus specimens.

456 In order to selectively induce microcephaly and other observed changes in the brain, ZIKV must either  
457 alter pathways that affect CNS development or directly infect cells of the CNS. Comparisons to other

458 viral TORCH pathogens strongly support the second possibility. It is worth noting that the early  
459 preparation of ZIKV in the laboratory setting was performed by intracerebral passage of the virus in  
460 neonatal mice. One study from 1971 presents an excellent microscopic examination of the brains of  
461 these mice (141). The authors catalog disruption of the pyriform cell layer of the Ammon's horn and  
462 increased number of astrocytes without the presentation of infiltrating leukocytes. Examination of the  
463 tissue by electron microscopy reveals infected astroglia and neurons, but not microglia. The first  
464 indication that this was happening in humans involved histologic and molecular examination of products  
465 of conception including fetal brain tissue, which revealed the presence of viral particles in the brain of a  
466 fetus at 32 weeks of gestation (13). These findings have been supported and confirmed by a second  
467 paper examining another infected fetus (12). These case reports not only support the conclusion that  
468 the virus can replicate in cells of the CNS, but that the CNS serves as a site of viral persistence long after  
469 the mother was exposed. Again, the propensity for first trimester exposures to ZIKV provides clues  
470 about the possible mechanisms of neuropathogenesis. During the first trimester, the fetal blood brain  
471 barrier is 'leaky' and does not serve as a complete barrier against pathogens. Infection of the placenta  
472 in the first trimester and induction of fetal viremia may sufficiently disseminate virus, thereby enabling  
473 ZIKV access to the brain. Fetal development of a well-formed blood brain barrier later in pregnancy may  
474 also reduce the risk of CNS infection. A second possibility is that the frequency of target cells in the  
475 brain changes over time. A seminal report by Tang *et al.* reveals that ZIKV can infect neural progenitors  
476 (19) and this has been more recently confirmed in a study of ZIKV infection of human cerebral organoids  
477 in culture (18, 21). Infection of the brain in the first trimester might lead to infection of these precursor  
478 cells and associated pathology due to the ability of ZIKV to slow cellular replication and induce cell  
479 death. Supporting this hypothesis, direct examination of tissue from at least one ZIKV-positive fetus  
480 indicates that mature neurons are relatively unperturbed, suggesting that the progenitors may be  
481 preferentially infected (12). However, the reports by Bell *et al.* discussed above, as well as recent studies

482 involving a more natural route of infection (142), demonstrate that infection of more mature brain cells  
 483 is possible (141). Examination of the literature reveals the presence of Tyro3, AXL, DC-SIGN and TIM-1  
 484 on multiple cells in the CNS, leading to the hypothesis that multiple cell types might be infected (Table  
 485 2).

486 **Table 2: Expression of ZIKV receptors in human brain and placental tissue.** NA = data not available

|                                 | DC-SIGN | AXL | Tyro3 | TIM-1 | Evidence of Infection                  | References          |
|---------------------------------|---------|-----|-------|-------|----------------------------------------|---------------------|
| <b>CNS</b>                      |         |     |       |       |                                        |                     |
| <b>Vascular Endothelial</b>     | -       | +   | -     | NA    | Productive infection in tissue culture | (143-146)           |
| <b>Perivascular macrophages</b> | NA      | +   | +     | NA    |                                        | (147)               |
| <b>Astroglia</b>                | -       | +   | +     | NA    | EM in mice                             | (143-146, 148, 149) |
| <b>Microglia</b>                | -       | +   | +     | NA    |                                        | (143-146, 150)      |
| <b>Neurons</b>                  | -       | +   | +     | NA    | EM in mice                             | (143-145, 149)      |
| <b>Neuronal Precursors</b>      | NA      | NA  | NA    | NA    | Productive infection in tissue culture | (19)                |
| <b>Placenta</b>                 |         |     |       |       |                                        |                     |
| <b>Trophoblast</b>              | -       | +   | +     | NA    | Pathology                              | (139, 143)          |
| <b>Dendritic Cells</b>          | +       | +   | +     | NA    |                                        | (147, 151, 152)     |

487

488 [Permissiveness to viral infection and alteration in cellular pathways](#)

489 Not all cells expressing the receptor for a given virus are capable of being productively infected. The  
 490 presence or absence of specific factors in the cell influence whether the virus can successfully establish  
 491 an infection and produce more virus. At this time, little is known about the intracellular factors which  
 492 may influence ZIKV replication. It may be that not all cells that display the appropriate receptors are  
 493 capable of supporting viral replication. Genome wide RNAi screens have identified hundreds of cellular  
 494 factors involved in flavivirus replication (153). Many of these factors are involved in critical host cell  
 495 pathways such as: nucleic acid production, protein production and transport, lipid metabolism and

496 energy production (153-155). Various interferon responsive genes have been shown to block flavivirus  
497 replication, as highlighted by the numerous mechanisms employed by the virus to counter these effects.  
498 However, in the absence of interferon, it is unclear if any cells are truly non-permissive to ZIKV infection.  
499 What is clear is that flaviviruses have evolved multiple strategies for altering normal host cellular  
500 pathways to favor viral replication. Stress granules and P-bodies are accumulations of RNA found in the  
501 cytoplasm of cells that are involved in stress response, heat shock and response to infection by viruses  
502 (156, 157). Flaviviruses alter both of these granule types to increase viral replication. Interaction of viral  
503 non-coding regions with stress granule proteins has been implicated in increased viral RNA synthesis and  
504 processing of viral RNA by enzymes in the P-body, which leads to the accumulation of a non-coding viral  
505 RNA that may be involved in protecting the viral RNA against RNA interference (158, 159).

506 The existence of flavivirus encoded non-coding RNA (ncRNA) is of potential relevance to development of  
507 fetal neuropathology. The genome of ZIKV and other flaviviruses is relatively small. As such, there is  
508 evolutionary pressure to make efficient use of all available sequence to support viral replication and  
509 evasion of adaptive and innate host defenses. That the virus supports and maintains RNA and RNA  
510 structural motifs that are not directly used in the coding of proteins suggests that this non-coding RNA  
511 serves an important role in the viral life cycle (160). The production of ncRNA in flaviviruses is due to  
512 the incomplete digestion of viral RNA by XRN1, an exonuclease found in the P-body (159). Secondary  
513 structure in a stem loop within the untranslated region (UTR) prevent digestion of this area and leads to  
514 accumulation of viral ncRNA. Interestingly, this ncRNA seems to be essential for cytopathicity and viral  
515 pathogenesis. Viruses with mutations in the 3'UTR have no deficit in their ability to make viral RNA, but  
516 show attenuated cytopathic effects in infected cells. Two possible explanations have been given for this  
517 observation. The first is that the ncRNA modulates the host innate sensing proteins (Toll like receptors  
518 including TLR3, RIG-I and MDA5). Other studies show evidence that this ncRNA can function to inhibit  
519 the RNA interference pathway and alter the expression of host genes (161). When primary human

520 fibroblasts are infected with Dengue virus, innate immune response signaling pathways are activated  
521 through both TLR3 and RIG- 1, but not Mda5, triggering up-regulation of IFN $\beta$ , TNF $\alpha$ , defensin 5 (HB5)  
522 and  $\beta$  defensin 2 (H $\beta$ D2) (162). Heritable mutations in RIG-I and MDA5 coding sequences have been  
523 identified as causative for Type 1 interferonopathies (inherited autoimmune disorders associated with  
524 an inborn elevated interferon response) including Aicardi-Goutières syndrome, Systemic Lupus  
525 Erythematosus (SLE) in certain individuals as well as classic and atypical Singleton-Merten syndrome  
526 (163). As reviewed above, the radiographic characteristics of these syndromes overlap considerably  
527 with findings associated with both intrauterine CMV infection and Zika fetal syndrome. Prior  
528 assessment of therapeutic strategies for Aicardi-Goutières syndrome may help inform treatment options  
529 for Zika fetal syndrome (164). Hydroxychloroquine, used to treat SLE cerebritis and considered safe in  
530 pregnancy, is a potent inhibitor of Type I IFNs, and this therapeutic strategy may figure into the selection  
531 of drug-like entities being contemplated for treating pregnant women suffering from acute ZIKV (165-  
532 167).

533 Interactions of cellular proteins with the untranslated regions of the full length ZIKV RNA may also be  
534 critical for function. Examination of the West Nile Virus has shown that two cellular RNA-binding  
535 proteins, TIA-1 and TIAR, interact with the 3' untranslated region (3'UTR) of that virus (158, 168). These  
536 proteins are essential host factors involved in formation of stress granules, and are sequestered at the  
537 site of viral RNA synthesis; an event that inhibits stress granule formation (168, 169). Viruses deficient  
538 in TIA-1 and TIAR binding replicate at a diminished rate in fibroblasts. A similar mechanism has been  
539 described for Dengue Virus (168). Due to the similarities to the secondary structure of the 3'UTR of  
540 these flaviviruses, ZIKV is likely to have similar effects. Whether ZIKV genomic or subgenomic RNA has  
541 binding sites for other host factors remains to be seen. Engagement of RNA-binding proteins specific to  
542 the brain or placenta by ZIKV might explain the pathology seen in the current epidemic.



543 The ability of ZIKV non-coding RNA to recruit cellular proteins might provide some insight into possible  
544 mechanisms of neuropathogenesis. The unique sequence of ZIKV may provide new targets for  
545 interaction with cellular proteins that are not seen in related viruses such as Dengue. Of particular  
546 interest will be whether factors specific to either the CNS or placenta bind to and regulate ZIKV RNA  
547 translation or replication. For example, the RNA binding protein Musashi-1 is expressed at high levels in  
548 neural precursors cells and can be found in both decidual and trophoblast cells in the placenta (140,  
549 170).

550 Musashi-1 is required for differentiation and division of neural precursors, and is often used as a marker  
551 in identification of these cells (171, 172). Studies have revealed a role for Musashi as a regulator of  
552 mRNA translation, and that the protein is capable of both inhibiting and activating translation (173).  
553 Specifically, Musashi proteins play a role in regulating progenitor (stem) cell growth and differentiation  
554 through post-transcriptional control of gene expression (174). Musashi is also expressed in, and has  
555 been shown to influence mRNA translation in, a variety of epithelial stem cell types associated with  
556 glandular epithelium (174-177), spermatogenesis (178), brain and retinal tissue development (179, 180).

557 Utilizing sequence alignment methods and available genomes of both historic and current ZIKV isolates,  
558 we have discovered a putative Musashi Binding Element (MBE) in the SL2 stem-loop of the 3'UTR (Figure  
559 2) (181-184). Examination of ZIKV epidemic strains has revealed conserved changes in the NS2B open  
560 reading frame and 3'UTR relative to ancestral strains found in Africa (184). Our alignment confirms this,  
561 and highlights that two of these changes lie immediately upstream from the putative MBE. Both insects  
562 and mammals have Musashi homologs, and it has been reported that they bind MBE with slightly  
563 different sequence requirements (185). Application of the binding energy predictions of this work  
564 suggests that the evolutionary nucleotide polymorphism alterations observed in the region immediately  
565 upstream to the ZIKV core MBE may alter binding in mammals, but not the mosquito host. Given the  
566 expression of Musashi in neuronal precursors and the placenta, it will be critical to determine whether

567 this element is involved in ZIKV pathogenesis, and if so, what ZIKV nucleotide polymorphisms may be  
568 associated with alterations in ZIKV Musashi Binding Element activity.

569 **Figure 2: Alignment of first 130 nucleotides of 3'UTR of ZIKV illustrating Musashi Binding Element**  
570 **location and associated mutations over time and geographic spread.** Sequences shown are the only  
571 that are unique for country and/or sequence, duplicates of same country were discarded. Alignment  
572 performed using MAFFT. Visualization using Geneious. Presence of SL I and SL II on those sequences,  
573 being SL II partially shown. Presence of Musashi Binding Element (MBE) on SL II, with two SNPs on  
574 African sequences, which could potentially change the RNA structure and availability of the element. SL  
575 I and SL II were annotated from Zhu Z. *et al.* MBE was annotated using the UTRscan tool of the UTRSite.  
576

577 Flavivirus proteins insert themselves into the membrane of the endoplasmic reticulum (ER), forming  
578 invaginations that contain all of the proteins and RNA needed to produce additional viral RNA (186).  
579 These invaginations are connected to the cytoplasm by a small pore, through which the RNA is  
580 presumably passed to engage nearby ribosomes (187). Viral capsids are then assembled and enveloped  
581 by budding into the membranes of the Golgi. This dependence on membranes and the need to produce  
582 enough phospholipids to envelope all of the progeny virions has lead flaviviruses to evolve mechanism  
583 to alter membrane synthesis, lipid metabolism and ER processing (188-193).

584 The classic sign of flavivirus infection is the visualization by electron microscopy of small 'viral factories'  
585 where viral RNA and protein is made and then assembled into complete virions for release through the  
586 cellular transport system. It has been noted that these assemblages look very much like the  
587 autophagosomes formed during the process of autophagy. Autophagy is a normal cellular process  
588 wherein the cell digests large protein complex or intracellular pathogens, and has been shown to play an  
589 important role in the maintenance of stem cells (194). This process can provide a way for a cell to  
590 recycle materials under conditions of starvation or as a way to respond to intracellular infection (195).  
591 Studies of cells infected by ZIKV and other flaviviruses have shown an increase in the levels of autophagy  
592 (137, 196-198). Microscopic examination of intracellular compartments has revealed the presence of

593 viral envelope protein (E protein) in the same vesicles as the autophagy marker LC3 (137). This suggests  
594 that the vesicles into which the virus buds may be autophagosomes. Some viruses block the late stages  
595 of autophagy, leading to the accumulation of autophagosomes that do not fuse with the lysosome.  
596 However, it seems that ZIKV does not block this step, and LC3 and E protein can be detected in mature  
597 autolysosomes. As the proper maturation of the viral envelope prior to release is pH dependent, it is  
598 possible that the virus has co-opted this pathway to maintain the correct pH and access proteases  
599 needed for maturation of the viral E protein. The trophoblast layer of the placenta produces miRNA that  
600 are pro-autophagic in nature, and which are delivered to bystander cells by exosomes (119). It is  
601 thought that this is a mechanism to make the trophoblast (and the cells in contact with it) more  
602 resistant to viral infection. However, in the case of ZIKV, this mechanism may help replication and  
603 spread by the virus once initial infection has been established, and could increase the susceptibility of  
604 nearby myeloid cells. Multiple lines of research suggest a role for autophagy in neurodegenerative  
605 diseases, which suggests that these ZIKV mediated changes in autophagy may also be involved in the  
606 observed neuropathic effects (195, 199, 200). Pharmacologic inhibition of autophagy is associated with  
607 inhibition of ZIKV replication in a variety of cell types, including human astrocytes (4, 137).

### 608 **Unanswered questions**

609 In order to more completely understand the link between ZIKV infection and fetal abnormalities, more  
610 work must be done. The characteristic presentation of Zika Fetal Syndrome ranges from viral centric  
611 (microcephaly, blindness, ventricular calcifications and fetal presence of ZIKV by rt-PCR) to another  
612 extreme (long bone dysgenesis, negative for ZIKV) possibly associated with placental insufficiency.  
613 Epidemiological assessment of potential confounding risk factors for Zika fetal syndrome, including  
614 preceding immunologically cross-reactive arboviral infection and potential thalidomide sharing by  
615 patients being treated for leprosy, remains to be completed (14, 201, 202). To underscore the point,

616 leprosy is now endemic throughout much of Brazil including Pernambuco (203), and post exposure  
617 prophylaxis of exposed individuals has been advocated (204, 205).

618 The gaps in understanding of ZIKV neuropathology highlighted in this review suggest that efforts should  
619 first be focused on obtaining clear, statistically significant data addressing a few specific questions.  
620 Prospective case control study reports on ZIKV infection of pregnant women and fetal outcomes are a  
621 step in the right direction. As such studies continue, a more definitive correlation between ZIKV  
622 infection and various congenital outcomes will become possible. Additionally, fundamental research  
623 will be required to answer questions regarding the ability of ZIKV to cross the placenta and infect the  
624 developing brain. Based on the published report of receptors utilized by ZIKV, a more complete survey  
625 of expression levels of these proteins in cells of the placenta should be prioritized. There is a desperate  
626 need for high quality histology and EM analysis of brain and placental tissue from different times after  
627 exposure. Although the Mlakar *et al.* report showed convincing evidence for the presence of viral  
628 particles in the brain of a thirty-two-week fetus, the method of fixation unfortunately makes it  
629 impossible to tell what specific cells may have been infected (13). A more recent analysis provides  
630 better clarity, but more studies will be needed (12). Some conclusions may be inferred from the work of  
631 Bell *et al.*, but the injection of virus directly into the brain of neonatal mice may not be physiologically  
632 relevant (141). Recent progress involving the development and characterization of ZIKV infection using  
633 the AG129 mouse model are consistent with the findings of Bell *et al.*, and may eventually enable a  
634 more complete understanding of the neural and glial tropism underlying ZIKV neuropathology (142).  
635 Although current literature provides some characterization of placental abnormalities, no definitive  
636 evidence has been shown supporting infection of specific cells of the placenta. A qualified animal model  
637 likely will be required to obtain this data. Finally, although PCR and histology are potentially powerful  
638 techniques, definitive proof of infection of a given tissue, or the relevance of virus reported in a

639 biological sample, can only be obtained when replication competent virus can be retrieved from these  
640 samples.

641 To begin to understand the mechanism of ZIKV neuropathogenesis, other experiments might be  
642 considered. A survey of serum from ZIKV infected individuals could shed light on the development of  
643 self-reactive antibodies and possible links to GBS. Prior research and study designs which have  
644 illuminated the roles of viral proteins and regions or motifs of viral RNA in the pathogenesis of other  
645 flavivirus infections need to be applied to clarify the molecular virology of ZIKV. To what extent does  
646 ZIKV activation of TLR-3 contribute to fetal neuropathology? Are migratory placental cells such as  
647 Hofbauer cells infected by ZIKV during fetal development? Do specific proteins from the placenta and  
648 brain bind to the non-coding regions of ZIKV and play a role in the observed neural tissue disease?

649 Recent studies have cataloged changes in the ZIKV genome as it has spread across the Pacific to the new  
650 world. Specific studies will be necessary to determine if these changes have in any way altered the  
651 transmissibility or virulence of the virus. Finally, the studied TORCH pathogens do not consistently cause  
652 pathology. It has been hypothesized that ZIKV infection may achieve access to the placenta and CNS  
653 secondary to some other event. Larger datasets will be needed to determine if ZIKV enters the fetus  
654 following some other perturbation, or whether other cofactors or confounding variables are associated  
655 with the severe congenital and adult neuropathology, which is now being observed with the current  
656 ZIKV outbreak in the Americas. But what is most clear is that ZIKV fetal neuropathology represents a  
657 new disease which does not completely overlap with the epidemiology or pathophysiology of other  
658 TORCH pathogens, and which will demand effort, resources, unparalleled collaboration, and above all,  
659 open mindedness in formulating public health responses as well as obstetrical and pediatric  
660 management strategies.

661

662 **Figure 1: Projected teratogenic impact of maternal ZIKV infection on 2017-2018 birth cohort, Puerto**  
663 **Rico.**

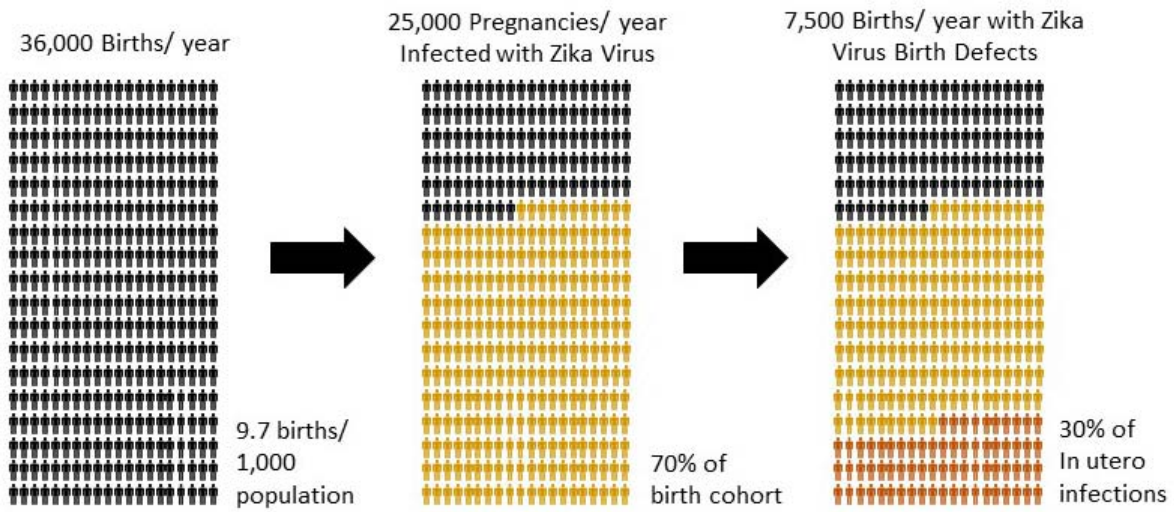

664

665 **Figure 2: Alignment of first 130 nucleotides of 3'UTR of ZIKV illustrating Musashi Binding Element**  
 666 **location and associated mutations over time and geographic spread.**

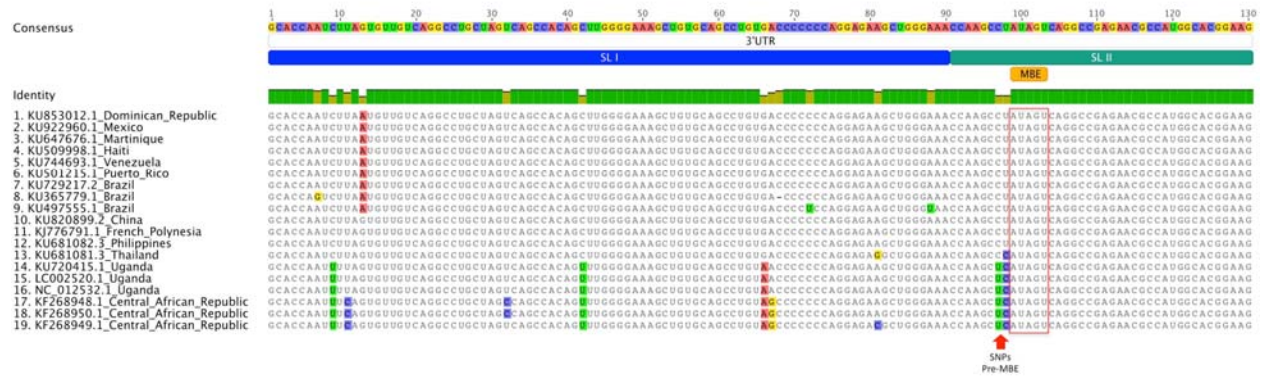

667

## 668   References

- 669   1.       Dick GW. Zika virus. II. Pathogenicity and physical properties. *Trans R Soc Trop Med Hyg.*  
670   1952;46(5):521-34.
- 671   2.       Dick GW, Kitchen SF, Haddow AJ. Zika virus. I. Isolations and serological specificity. *Trans R Soc*  
672   *Trop Med Hyg.* 1952;46(5):509-20.
- 673   3.       Macnamara FN. Zika virus: a report on three cases of human infection during an epidemic of  
674   jaundice in Nigeria. *Trans R Soc Trop Med Hyg.* 1954;48(2):139-45.
- 675   4.       Malone RW, Homan J, Callahan MV, Glasspool-Malone J, Damodaran L, Schneider Ade B, et al.  
676   Zika Virus: Medical Countermeasure Development Challenges. *PLoS neglected tropical diseases.*  
677   2016;10(3):e0004530.
- 678   5.       Lednicky J, Beau De Rochars VM, El Badry M, Loeb J, Telisma T, Chavannes S, et al. Zika Virus  
679   Outbreak in Haiti in 2014: Molecular and Clinical Data. *PLoS neglected tropical diseases.*  
680   2016;10(4):e0004687.
- 681   6.       Fauci AS, Morens DM. Zika Virus in the Americas--Yet Another Arbovirus Threat. *N Engl J Med.*  
682   2016;374(7):601-4.
- 683   7.       Petersen E, Wilson ME, Touch S, McCloskey B, Mwaba P, Bates M, et al. Rapid Spread of Zika  
684   Virus in The Americas - Implications for Public Health Preparedness for Mass Gatherings at the 2016  
685   Brazil Olympic Games. *Int J Infect Dis.* 2016;44:11-5.
- 686   8.       Wang J, Valderramos SG, Wu A, Ouyang S, Li C, Brasil P, et al. From Mosquitos to Humans:  
687   Genetic Evolution of Zika Virus. *Cell Host & Microbe.* 2016.
- 688   9.       Russell PK. The Zika Pandemic - A Perfect Storm? *PLoS neglected tropical diseases.*  
689   2016;10(3):e0004589.
- 690   10.      Miranda-Filho Dde B, Martelli CM, Ximenes RA, Araujo TV, Rocha MA, Ramos RC, et al. Initial  
691   Description of the Presumed Congenital Zika Syndrome. *Am J Public Health.* 2016;106(4):598-600.



- 692 11. Cavalheiro S, Lopez A, Serra S, Da Cunha A, da Costa MD, Moron A, et al. Microcephaly and Zika  
693 virus: neonatal neuroradiological aspects. *Childs Nerv Syst.* 2016.
- 694 12. Driggers RW, Ho CY, Korhonen EM, Kuivanen S, Jaaskelainen AJ, Smura T, et al. Zika Virus  
695 Infection with Prolonged Maternal Viremia and Fetal Brain Abnormalities. *N Engl J Med.* 2016.
- 696 13. Mlakar J, Korva M, Tul N, Popovic M, Poljsak-Prijatelj M, Mraz J, et al. Zika Virus Associated with  
697 Microcephaly. *N Engl J Med.* 2016.
- 698 14. Paul LM, Carlin ER, Jenkins MM, Tan AL, Barcellona CM, Nicholson CO, et al. Dengue Virus  
699 Antibodies Enhance Zika Virus Infection. *bioRxiv.* 2016.
- 700 15. Cao-Lormeau VM, Blake A, Mons S, Lastere S, Roche C, Vanhomwegen J, et al. Guillain-Barre  
701 Syndrome outbreak associated with Zika virus infection in French Polynesia: a case-control study.  
702 *Lancet.* 2016.
- 703 16. Kostyuchenko VA, Lim EXY, Zhang S, Fibriansah G, Ng T-S, Ooi JSG, et al. Structure of the  
704 thermally stable Zika virus. *Nature.* 2016;advance online publication.
- 705 17. Calvet G, Aguiar R, Melo A, Sampaio S, de Filippis I, Fabri A, et al. Detection and sequencing of  
706 Zika virus from amniotic fluid  
707 of fetuses with microcephaly in Brazil: a case study. *Lancet Infect Dis.* 2016.
- 708 18. Garcez PP, Loiola EC, Madeiro da Costa R, Higa LM, Trindade P, Delvecchio R, et al. Zika virus  
709 impairs growth in human neurospheres and brain organoids. *Science.* 2016.
- 710 19. Tang H, Hammack C, Ogden SC, Wen Z, Qian X, Li Y, et al. Zika Virus Infects Human Cortical  
711 Neural Progenitors and Attenuates Their Growth. *Cell Stem Cell.* 2016.
- 712 20. Delvecchio R, Higa LM, Pezzuto P, Valadao AL, Garcez PP, Monteiro FL, et al. Chloroquine inhibits  
713 Zika Virus infection in different cellular models. *bioRxiv.* 2016.

- 714 21. Dang J, Tiwari SK, Lichinchi G, Qin Y, Patil VS, Eroshkin AM, et al. Zika Virus Depletes Neural  
715 Progenitors in Human Cerebral Organoids through Activation of the Innate Immune Receptor TLR3. *Cell*  
716 *Stem Cell*. 2016;19:1-8.
- 717 22. Besnard M, Eyrolle-Guignot D, Guillemette-Artur P, Lastere S, Bost-Bezeaud F, Marcelis L, et al.  
718 Congenital cerebral malformations and dysfunction in fetuses and newborns following the 2013 to 2014  
719 Zika virus epidemic in French Polynesia. *Euro Surveill*. 2016;21(13).
- 720 23. Brasil P, Pereira JP, Jr., Raja Gabaglia C, Damasceno L, Wakimoto M, Ribeiro Nogueira RM, et al.  
721 Zika Virus Infection in Pregnant Women in Rio de Janeiro - Preliminary Report. *N Engl J Med*. 2016.
- 722 24. Nunes ML, Carlini CR, Marinowic D, Neto FK, Fiori HH, Scotta MC, et al. Microcephaly and Zika  
723 virus: a clinical and epidemiological analysis of the current outbreak in Brazil. *J Pediatr (Rio J)*. 2016.
- 724 25. Dirlikov E, Ryff KR, Torres-Aponte J, Thomas DL, Perez-Padilla J, Munoz-Jordan J, et al. Update:  
725 Ongoing Zika Virus Transmission - Puerto Rico, November 1, 2015-April 14, 2016. *MMWR Morb Mortal*  
726 *Wkly Rep*. 2016;65(17):451-5.
- 727 26. Musso D, Nhan T, Robin E, Roche C, Bierlaire D, Zisou K, et al. Potential for Zika virus  
728 transmission through blood transfusion demonstrated during an outbreak in French Polynesia,  
729 November 2013 to February 2014. *Euro Surveill*. 2014;19(14).
- 730 27. Nguyen NM, Tran CN, Phung LK, Duong KT, Huynh Hle A, Farrar J, et al. A randomized, double-  
731 blind placebo controlled trial of balapiravir, a polymerase inhibitor, in adult dengue patients. *J Infect Dis*.  
732 2013;207(9):1442-50.
- 733 28. Petersen LR, Jamieson DJ, Powers AM, Honein MA. Zika Virus. *N Engl J Med*. 2016.
- 734 29. Brasil P, Calvet GA, Siqueira AM, Wakimoto M, de Sequeira PC, Nobre A, et al. Zika Virus  
735 Outbreak in Rio de Janeiro, Brazil: Clinical Characterization, Epidemiological and Virological Aspects.  
736 *PLoS neglected tropical diseases*. 2016;10(4):e0004636.

- 737 30. Faria NR, Azevedo RD, Kraemer MU, Souza R, Cunha MS, Hill SC, et al. Zika virus in the Americas:  
738 Early epidemiological and genetic findings. *Science*. 2016.
- 739 31. Staples JE, Dziuban EJ, Fischer M, Cragan JD, Rasmussen SA, Cannon MJ, et al. Interim Guidelines  
740 for the Evaluation and Testing of Infants with Possible Congenital Zika Virus Infection - United States,  
741 2016. *MMWR Morb Mortal Wkly Rep*. 2016;65(3):63-7.
- 742 32. Nishiura H, Kinoshita R, Mizumoto K, Yasuda Y, Nah K. Transmission potential of Zika virus  
743 infection in the South Pacific. *Int J Infect Dis*. 2016;45:95-7.
- 744 33. Nishiura H, Mizumoto K, Villamil-Gomez WE, Rodriguez-Morales AJ. Preliminary estimation of  
745 the basic reproduction number of Zika virus infection during Colombia epidemic, 2015-2016. *Travel Med*  
746 *Infect Dis*. 2016.
- 747 34. Rojas DP, Dean NE, Yang Y, Kenah E, Quintero J, Tomasi S, et al. The Epidemiology and  
748 Transmissibility of Zika Virus in Girardot and San Andres Island, Colombia. *bioRxiv*. 2016.
- 749 35. Duffy MR, Chen TH, Hancock WT, Powers AM, Kool JL, Lanciotti RS, et al. Zika virus outbreak on  
750 Yap Island, Federated States of Micronesia. *N Engl J Med*. 2009;360(24):2536-43.
- 751 36. Cauchemez S, Besnard M, Bompard P, Dub T, Guillemette-Artur P, Eyrolle-Guignot D, et al.  
752 Association between Zika virus and microcephaly in French Polynesia, 2013-15: a retrospective study.  
753 *Lancet*. 2016.
- 754 37. Paploski IA, Prates AP, Cardoso CW, Kikuti M, Silva MM, Waller LA, et al. Time Lags between  
755 Exanthematous Illness Attributed to Zika Virus, Guillain-Barre Syndrome, and Microcephaly, Salvador,  
756 Brazil. *Emerg Infect Dis*. 2016;22(8).
- 757 38. D'Ortenzio E, Matheron S, de Lamballerie X, Hubert B, Piorkowski G, Maquart M, et al. Evidence  
758 of Sexual Transmission of Zika Virus. *N Engl J Med*. 2016.

- 759 39. Venturi G, Zammarchi L, Fortuna C, Remoli ME, Benedetti E, Fiorentini C, et al. An  
760 autochthonous case of Zika due to possible sexual transmission, Florence, Italy, 2014. *Euro Surveill.*  
761 2016;21(8).
- 762 40. Petersen EE, Polen KN, Meaney-Delman D, Ellington SR, Oduyebo T, Cohn A, et al. Update:  
763 Interim Guidance for Health Care Providers Caring for Women of Reproductive Age with Possible Zika  
764 Virus Exposure - United States, 2016. *MMWR Morb Mortal Wkly Rep.* 2016;65(12):315-22.
- 765 41. Deckard DT, Chung WM, Brooks JT, Smith JC, Woldai S, Hennessey M, et al. Male-to-Male Sexual  
766 Transmission of Zika Virus - Texas, January 2016. *MMWR Morb Mortal Wkly Rep.* 2016;65(14):372-4.
- 767 42. Dupont-Rouzeyrol M, Biron A, O'Connor O, Huguon E, Descloux E. Infectious Zika viral particles  
768 in breastmilk. *Lancet.* 2016;387(10023):1051.
- 769 43. Mansuy JM, Dutertre M, Mengelle C, Fourcade C, Marchou B, Delobel P, et al. Zika virus: high  
770 infectious viral load in semen, a new sexually transmitted pathogen? *Lancet Infect Dis.* 2016.
- 771 44. Song H, Li J, Shi S, Yan L, Zhuang H, Li K. Thermal stability and inactivation of hepatitis C virus  
772 grown in cell culture. *Virology journal.* 2010;7:40.
- 773 45. Madani TA, Abuelzein el TM, Azhar EI, Al-Bar HM. Thermal inactivation of Alkhumra  
774 hemorrhagic fever virus. *Arch Virol.* 2014;159(10):2687-91.
- 775 46. Doerrbecker J, Friesland M, Ciesek S, Erichsen TJ, Mateu-Gelabert P, Steinmann J, et al.  
776 Inactivation and survival of hepatitis C virus on inanimate surfaces. *J Infect Dis.* 2011;204(12):1830-8.
- 777 47. Ciesek S, Friesland M, Steinmann J, Becker B, Wedemeyer H, Manns MP, et al. How stable is the  
778 hepatitis C virus (HCV)? Environmental stability of HCV and its susceptibility to chemical biocides. *J Infect*  
779 *Dis.* 2010;201(12):1859-66.
- 780 48. Barrett PN, Meyer H, Wachtel I, Eibl J, Dorner F. Determination of the inactivation kinetics of  
781 hepatitis A virus in human plasma products using a simple TCID50 assay. *J Med Virol.* 1996;49(1):1-6.

- 782 49. PAHO. Significant Findings, Zika virus detection in *Aedes albopictus* in Mexico. Zika -  
783 Epidemiological Update. 2016;10 -1.
- 784 50. Shet A. Congenital and perinatal infections: throwing new light with an old TORCH. Indian  
785 journal of pediatrics. 2011;78(1):88-95.
- 786 51. Lamont RF, Sobel JD, Carrington D, Mazaki-Tovi S, Kusanovic JP, Vaisbuch E, et al. Varicella-  
787 zoster virus (chickenpox) infection in pregnancy. BJOG : an international journal of obstetrics and  
788 gynaecology. 2011;118(10):1155-62.
- 789 52. George IO, Frank-Briggs AI, Oruamabo RS. Congenital rubella syndrome: pattern and  
790 presentation in a southern Nigerian tertiary hospital. World journal of pediatrics : WJP. 2009;5(4):287-  
791 91.
- 792 53. Kabra NS, Thabane L. Acyclovir prophylaxis to prevent herpes simplex virus recurrence at  
793 delivery: a systematic review. Obstet Gynecol. 2004;103(5 Pt 1):1004; author reply -5.
- 794 54. Adams Waldorf KM, McAdams RM. Influence of infection during pregnancy on fetal  
795 development. Reproduction. 2013;146(5):R151-62.
- 796 55. Cooper LZ. The history and medical consequences of rubella. Rev Infect Dis. 1985;7 Suppl 1:S2-  
797 10.
- 798 56. Ueda K. Epidemiology of rubella and congenital rubella syndrome in Japan before 1989. Vaccine.  
799 2016;34(16):1971-4.
- 800 57. Mangala Prasad V, Willows SD, Fokine A, Battisti AJ, Sun S, Plevka P, et al. Rubella virus capsid  
801 protein structure and its role in virus assembly and infection. Proceedings of the National Academy of  
802 Sciences of the United States of America. 2013;110(50):20105-10.
- 803 58. DuBois RM, Vaney MC, Tortorici MA, Kurdi RA, Barba-Spaeth G, Krey T, et al. Functional and  
804 evolutionary insight from the crystal structure of rubella virus protein E1. Nature. 2013;493(7433):552-6.

- 805 59. Lee JY, Bowden DS. Rubella virus replication and links to teratogenicity. *Clinical microbiology*  
806 *reviews*. 2000;13(4):571-87.
- 807 60. Mastromarino P, Cioe L, Rieti S, Orsi N. Role of membrane phospholipids and glycolipids in the  
808 Vero cell surface receptor for rubella virus. *Medical microbiology and immunology*. 1990;179(2):105-14.
- 809 61. Dube M, Rey FA, Kielian M. Rubella virus: first calcium-requiring viral fusion protein. *PLoS*  
810 *pathogens*. 2014;10(12):e1004530.
- 811 62. Cong H, Jiang Y, Tien P. Identification of the myelin oligodendrocyte glycoprotein as a cellular  
812 receptor for rubella virus. *J Virol*. 2011;85(21):11038-47.
- 813 63. Nguyen TV, Pham VH, Abe K. Pathogenesis of Congenital Rubella Virus Infection in Human  
814 Fetuses: Viral Infection in the Ciliary Body Could Play an Important Role in Cataractogenesis.  
815 *EBioMedicine*. 2015;2(1):59-63.
- 816 64. Yoneda T, Urade M, Sakuda M, Miyazaki T. Altered growth, differentiation, and responsiveness  
817 to epidermal growth factor of human embryonic mesenchymal cells of palate by persistent rubella virus  
818 infection. *J Clin Invest*. 1986;77(5):1613-21.
- 819 65. Atreya CD, Kulkarni S, Mohan KV. Rubella virus P90 associates with the cytokinesis regulatory  
820 protein Citron-K kinase and the viral infection and constitutive expression of P90 protein both induce  
821 cell cycle arrest following S phase in cell culture. *Arch Virol*. 2004;149(4):779-89.
- 822 66. Di Cunto F, Imarisio S, Hirsch E, Broccoli V, Bulfone A, Migheli A, et al. Defective neurogenesis in  
823 citron kinase knockout mice by altered cytokinesis and massive apoptosis. *Neuron*. 2000;28(1):115-27.
- 824 67. Banatvala JE, Potter JE, Best JM. Interferon response to sendai and rubella viruses in human  
825 foetal cultures, leucocytes and placental cultures. *J Gen Virol*. 1971;13(2):193-201.
- 826 68. Glass RB, Fernbach SK, Norton KI, Choi PS, Naidich TP. The infant skull: a vault of information.  
827 *Radiographics*. 2004;24(2):507-22.
- 828 69. Dudgeon JA. Maternal rubella and its effect on the foetus. *Arch Dis Child*. 1967;42(222):110-25.

- 829 70. Kylat RI, Kelly EN, Ford-Jones EL. Clinical findings and adverse outcome in neonates with  
830 symptomatic congenital cytomegalovirus (SCCMV) infection. *European journal of pediatrics*.  
831 2006;165(11):773-8.
- 832 71. Alford CA, Stagno S, Pass RF, Britt WJ. Congenital and perinatal cytomegalovirus infections. *Rev*  
833 *Infect Dis*. 1990;12 Suppl 7:S745-53.
- 834 72. Iltis AS, Demmler GJ, Dobbins JG, Stewart JA. Surveillance for congenital cytomegalovirus  
835 disease: a report from the National Congenital Cytomegalovirus Disease Registry. *Clin Infect Dis*.  
836 1995;20(3):665-70.
- 837 73. Barkovich AJ, Lindan CE. Congenital cytomegalovirus infection of the brain: imaging analysis and  
838 embryologic considerations. *AJNR Am J Neuroradiol*. 1994;15(4):703-15.
- 839 74. Steinlin M, Nadal D, Eich GF, Martin E, Boltshauser EJ. Late intrauterine Cytomegalovirus  
840 infection: clinical and neuroimaging findings. *Pediatr Neurol*. 1996;15(3):249-53.
- 841 75. Crow YJ, Manel N. Aicardi-Goutieres syndrome and the type I interferonopathies. *Nat Rev*  
842 *Immunol*. 2015;15(7):429-40.
- 843 76. Tonduti D, Orcesi S, Jenkinson EM, Dorboz I, Renaldo F, Panteghini C, et al. Clinical, radiological  
844 and possible pathological overlap of cystic leukoencephalopathy without megalencephaly and Aicardi-  
845 Goutieres syndrome. *Eur J Paediatr Neurol*. 2016.
- 846 77. Compton T. Receptors and immune sensors: the complex entry path of human cytomegalovirus.  
847 *Trends in cell biology*. 2004;14(1):5-8.
- 848 78. Boyle KA, Compton T. Receptor-binding properties of a soluble form of human cytomegalovirus  
849 glycoprotein B. *J Virol*. 1998;72(3):1826-33.
- 850 79. Compton T, Nowlin DM, Cooper NR. Initiation of human cytomegalovirus infection requires  
851 initial interaction with cell surface heparan sulfate. *Virology*. 1993;193(2):834-41.

- 852 80. Wang X, Huong SM, Chiu ML, Raab-Traub N, Huang ES. Epidermal growth factor receptor is a  
853 cellular receptor for human cytomegalovirus. *Nature*. 2003;424(6947):456-61.
- 854 81. Feire AL, Koss H, Compton T. Cellular integrins function as entry receptors for human  
855 cytomegalovirus via a highly conserved disintegrin-like domain. *Proceedings of the National Academy of*  
856 *Sciences of the United States of America*. 2004;101(43):15470-5.
- 857 82. Lopper M, Compton T. Coiled-coil domains in glycoproteins B and H are involved in human  
858 cytomegalovirus membrane fusion. *J Virol*. 2004;78(15):8333-41.
- 859 83. Kenneson A, Cannon MJ. Review and meta-analysis of the epidemiology of congenital  
860 cytomegalovirus (CMV) infection. *Rev Med Virol*. 2007;17(4):253-76.
- 861 84. Hamilton ST, Scott G, Naing Z, Iwasenko J, Hall B, Graf N, et al. Human cytomegalovirus-induces  
862 cytokine changes in the placenta with implications for adverse pregnancy outcomes. *PloS one*.  
863 2012;7(12):e52899.
- 864 85. Maidji E, Genbacev O, Chang HT, Pereira L. Developmental regulation of human cytomegalovirus  
865 receptors in cytotrophoblasts correlates with distinct replication sites in the placenta. *J Virol*.  
866 2007;81(9):4701-12.
- 867 86. Maidji E, McDonagh S, Genbacev O, Tabata T, Pereira L. Maternal antibodies enhance or prevent  
868 cytomegalovirus infection in the placenta by neonatal Fc receptor-mediated transcytosis. *Am J Pathol*.  
869 2006;168(4):1210-26.
- 870 87. Fisher S, Genbacev O, Maidji E, Pereira L. Human cytomegalovirus infection of placental  
871 cytotrophoblasts in vitro and in utero: implications for transmission and pathogenesis. *J Virol*.  
872 2000;74(15):6808-20.
- 873 88. Maidji E, Percivalle E, Gerna G, Fisher S, Pereira L. Transmission of human cytomegalovirus from  
874 infected uterine microvascular endothelial cells to differentiating/invasive placental cytotrophoblasts.  
875 *Virology*. 2002;304(1):53-69.



- 876 89. Connolly SA, Jackson JO, Jardetzky TS, Longnecker R. Fusing structure and function: a structural  
877 view of the herpesvirus entry machinery. *Nature reviews Microbiology*. 2011;9(5):369-81.
- 878 90. Kaewpoowat Q, Salazar L, Aguilera E, Wootton SH, Hasbun R. Herpes simplex and varicella  
879 zoster CNS infections: clinical presentations, treatments and outcomes. *Infection*. 2015.
- 880 91. Kopp SJ, Banisadr G, Glajch K, Maurer UE, Grunewald K, Miller RJ, et al. Infection of neurons and  
881 encephalitis after intracranial inoculation of herpes simplex virus requires the entry receptor nectin-1.  
882 *Proceedings of the National Academy of Sciences of the United States of America*. 2009;106(42):17916-  
883 20.
- 884 92. Finger-Jardim F, Teixeira LO, de Oliveira GR, Barral MF, da Hora VP, Goncalves CV, et al. Herpes  
885 simplex virus: prevalence in placental tissue and incidence in neonatal cord blood samples. *J Med Virol*.  
886 2014;86(3):519-24.
- 887 93. Koi H, Zhang J, Makrigiannakis A, Getsios S, MacCalman CD, Strauss JF, 3rd, et al.  
888 Syncytiotrophoblast is a barrier to maternal-fetal transmission of herpes simplex virus. *Biology of*  
889 *reproduction*. 2002;67(5):1572-9.
- 890 94. Barefoot KH, Little GA, Ornvold KT. Fetal demise due to herpes simplex virus: an illustrated case  
891 report. *J Perinatol*. 2002;22(1):86-8.
- 892 95. Kimberlin DW, Lin CY, Jacobs RF, Powell DA, Frenkel LM, Gruber WC, et al. Natural history of  
893 neonatal herpes simplex virus infections in the acyclovir era. *Pediatrics*. 2001;108(2):223-9.
- 894 96. Corey L, Wald A. Maternal and neonatal herpes simplex virus infections. *N Engl J Med*.  
895 2009;361(14):1376-85.
- 896 97. Spear PG, Longnecker R. Herpesvirus entry: an update. *J Virol*. 2003;77(19):10179-85.
- 897 98. Carpenter JE, Clayton AC, Halling KC, Bonthius DJ, Buckingham EM, Jackson W, et al. Defensive  
898 Perimeter in the Central Nervous System: Predominance of Astrocytes and Astrogliosis during Recovery  
899 from Varicella-Zoster Virus Encephalitis. *J Virol*. 2016;90(1):379-91.

- 900 99. Li Q, Ali MA, Cohen JJ. Insulin degrading enzyme is a cellular receptor mediating varicella-zoster  
901 virus infection and cell-to-cell spread. *Cell*. 2006;127(2):305-16.
- 902 100. Chamberlin TC. The Method of Multiple Working Hypotheses: With this method the dangers of  
903 parental affection for a favorite theory can be circumvented. *Science*. 1965;148(3671):754-9.
- 904 101. Lucchese G, Kanduc D. Zika virus and autoimmunity: From microcephaly to Guillain-Barre  
905 syndrome, and beyond. *Autoimmun Rev*. 2016.
- 906 102. Anaya JM, Ramirez-Santana C, Salgado-Castaneda I, Chang C, Ansari A, Gershwin ME. Zika virus  
907 and neurologic autoimmunity: the putative role of gangliosides. *BMC Med*. 2016;14:49.
- 908 103. Adibi JJ, Marques ET, Jr., Cartus A, Beigi RH. Teratogenic effects of the Zika virus and the role of  
909 the placenta. *Lancet*. 2016.
- 910 104. Johnson EL, Chu H, Byrareddy SN, Spearman P, Chakraborty R. Placental Hofbauer cells assemble  
911 and sequester HIV-1 in tetraspanin-positive compartments that are accessible to broadly neutralizing  
912 antibodies. *J Int AIDS Soc*. 2015;18(1):19385.
- 913 105. Young OM, Tang Z, Niven-Fairchild T, Tadesse S, Krikun G, Norwitz ER, et al. Toll-like receptor-  
914 mediated responses by placental Hofbauer cells (HBCs): a potential pro-inflammatory role for fetal M2  
915 macrophages. *Am J Reprod Immunol*. 2015;73(1):22-35.
- 916 106. Enders AC. Trophoblast differentiation during the transition from trophoblastic plate to lacunar  
917 stage of implantation in the rhesus monkey and human. *The American journal of anatomy*.  
918 1989;186(1):85-98.
- 919 107. Porterfield JS. Antibody-dependent enhancement of viral infectivity. *Advances in virus research*.  
920 1986;31:335-55.
- 921 108. Toth FD, Mosborg-Petersen P, Kiss J, Aboagye-Mathiesen G, Zdravkovic M, Hager H, et al.  
922 Antibody-dependent enhancement of HIV-1 infection in human term syncytiotrophoblast cells cultured  
923 in vitro. *Clinical and experimental immunology*. 1994;96(3):389-94.

- 924 109. Lyden TW, Robinson JM, Tridandapani S, Teillaud JL, Garber SA, Osborne JM, et al. The Fc  
925 receptor for IgG expressed in the villus endothelium of human placenta is Fc gamma RIIb2. *J Immunol.*  
926 2001;166(6):3882-9.
- 927 110. Ishikawa T, Takizawa T, Iwaki J, Mishima T, Ui-Tei K, Takeshita T, et al. Fc gamma receptor IIb  
928 participates in maternal IgG trafficking of human placental endothelial cells. *Int J Mol Med.*  
929 2015;35(5):1273-89.
- 930 111. Halstead SB. Dengue Antibody-Dependent Enhancement: Knowns and Unknowns. *Microbiology*  
931 *spectrum.* 2014;2(6).
- 932 112. Schmid MA, Diamond MS, Harris E. Dendritic cells in dengue virus infection: targets of virus  
933 replication and mediators of immunity. *Front Immunol.* 2014;5:647.
- 934 113. Gitlin D, Biasucci A. Development of gamma G, gamma A, gamma M, beta IC-beta IA, C 1  
935 esterase inhibitor, ceruloplasmin, transferrin, hemopexin, haptoglobin, fibrinogen, plasminogen, alpha  
936 1-antitrypsin, orosomucoid, beta-lipoprotein, alpha 2-macroglobulin, and prealbumin in the human  
937 conceptus. *J Clin Invest.* 1969;48(8):1433-46.
- 938 114. Gitlin D. Development and metabolism of the immunoglobulins. In: Kagan B, Stiehm E, editors.  
939 *Immunologic Incompetence: Year Book Medical Publishers; 1971. p. 3-13.*
- 940 115. Malek A, Sager R, Kuhn P, Nicolaidis KH, Schneider H. Evolution of maternofetal transport of  
941 immunoglobulins during human pregnancy. *Am J Reprod Immunol.* 1996;36(5):248-55.
- 942 116. Saji F, Samejima Y, Kamiura S, Koyama M. Dynamics of immunoglobulins at the fetomaternal  
943 interface. *Rev Reprod.* 1999;4(2):81-9.
- 944 117. Red-Horse K, Zhou Y, Genbacev O, Prakobphol A, Foulk R, McMaster M, et al. Trophoblast  
945 differentiation during embryo implantation and formation of the maternal-fetal interface. *J Clin Invest.*  
946 2004;114(6):744-54.

- 947 118. Homan J, Malone RW, Darnell SJ, Bremel RD. Antibody mediated epitope mimicry in the  
948 pathogenesis of Zika virus related disease. *bioRxiv*. 2016.
- 949 119. Delorme-Axford E, Donker RB, Mouillet JF, Chu T, Bayer A, Ouyang Y, et al. Human placental  
950 trophoblasts confer viral resistance to recipient cells. *Proceedings of the National Academy of Sciences*  
951 *of the United States of America*. 2013;110(29):12048-53.
- 952 120. Bayer ALNJOYBJCMSMETCSS, Y.; Coyne C.B. Type III Interferons Produced by Human Placental  
953 Trophoblasts Confer Protection against Zika Virus Infection. *Cell Host Microbe*. 2016.
- 954 121. Collantes-Fernandez E, Arrighi RB, Alvarez-Garcia G, Weidner JM, Regidor-Cerrillo J, Boothroyd  
955 JC, et al. Infected dendritic cells facilitate systemic dissemination and transplacental passage of the  
956 obligate intracellular parasite *Neospora caninum* in mice. *PloS one*. 2012;7(3):e32123.
- 957 122. Mold JE, Michaelsson J, Burt TD, Muench MO, Beckerman KP, Busch MP, et al. Maternal  
958 alloantigens promote the development of tolerogenic fetal regulatory T cells in utero. *Science*.  
959 2008;322(5907):1562-5.
- 960 123. Dollner H, Vatten L, Halgunset J, Rahimipoor S, Austgulen R. Histologic chorioamnionitis and  
961 umbilical serum levels of pro-inflammatory cytokines and cytokine inhibitors. *BJOG : an international*  
962 *journal of obstetrics and gynaecology*. 2002;109(5):534-9.
- 963 124. Woo SJ, Park KH, Jung HJ, Kim S, Choe G, Ahn J, et al. Effects of maternal and placental  
964 inflammation on retinopathy of prematurity. *Graefes Arch Clin Exp Ophthalmol*. 2012;250(6):915-23.
- 965 125. Ahn HM, Park EA, Cho SJ, Kim YJ, Park HS. The association of histological chorioamnionitis and  
966 antenatal steroids on neonatal outcome in preterm infants born at less than thirty-four weeks'  
967 gestation. *Neonatology*. 2012;102(4):259-64.
- 968 126. McAdams RM, Juul SE. The role of cytokines and inflammatory cells in perinatal brain injury.  
969 *Neurol Res Int*. 2012;2012:561494.

- 970 127. Kim CJ, Romero R, Chaemsaihong P, Kim JS. Chronic inflammation of the placenta: definition,  
971 classification, pathogenesis, and clinical significance. *Am J Obstet Gynecol.* 2015;213(4 Suppl):S53-69.
- 972 128. Ledger WJ. Perinatal infections and fetal/neonatal brain injury. *Curr Opin Obstet Gynecol.*  
973 2008;20(2):120-4.
- 974 129. Fernandez-Garcia MD, Mazzon M, Jacobs M, Amara A. Pathogenesis of flavivirus infections:  
975 using and abusing the host cell. *Cell Host Microbe.* 2009;5(4):318-28.
- 976 130. Robinson MJ, Sancho D, Slack EC, LeibundGut-Landmann S, Reis e Sousa C. Myeloid C-type  
977 lectins in innate immunity. *Nature immunology.* 2006;7(12):1258-65.
- 978 131. Davis CW, Nguyen HY, Hanna SL, Sanchez MD, Doms RW, Pierson TC. West Nile virus  
979 discriminates between DC-SIGN and DC-SIGNR for cellular attachment and infection. *J Virol.*  
980 2006;80(3):1290-301.
- 981 132. Lozach PY, Burleigh L, Staropoli I, Navarro-Sanchez E, Harriague J, Virelizier JL, et al. Dendritic  
982 cell-specific intercellular adhesion molecule 3-grabbing non-integrin (DC-SIGN)-mediated enhancement  
983 of dengue virus infection is independent of DC-SIGN internalization signals. *The Journal of biological*  
984 *chemistry.* 2005;280(25):23698-708.
- 985 133. Martina BE, Koraka P, van den Doel P, Rimmelzwaan GF, Haagmans BL, Osterhaus AD. DC-SIGN  
986 enhances infection of cells with glycosylated West Nile virus in vitro and virus replication in human  
987 dendritic cells induces production of IFN-alpha and TNF-alpha. *Virus research.* 2008;135(1):64-71.
- 988 134. Navarro-Sanchez E, Altmeyer R, Amara A, Schwartz O, Fieschi F, Virelizier JL, et al. Dendritic-cell-  
989 specific ICAM3-grabbing non-integrin is essential for the productive infection of human dendritic cells by  
990 mosquito-cell-derived dengue viruses. *EMBO reports.* 2003;4(7):723-8.
- 991 135. Tassaneetrithep B, Burgess TH, Granelli-Piperno A, Trumpfheller C, Finke J, Sun W, et al. DC-SIGN  
992 (CD209) mediates dengue virus infection of human dendritic cells. *The Journal of experimental*  
993 *medicine.* 2003;197(7):823-9.

- 994 136. van Kooyk Y, Geijtenbeek TB. DC-SIGN: escape mechanism for pathogens. *Nat Rev Immunol*.  
995 2003;3(9):697-709.
- 996 137. Hamel R, Dejarnac O, Wichit S, Ekchariyawat P, Neyret A, Luplertlop N, et al. Biology of Zika Virus  
997 Infection in Human Skin Cells. *J Virol*. 2015;89(17):8880-96.
- 998 138. Martines RB, Bhatnagar J, Keating MK, Silva-Flannery L, Muehlenbachs A, Gary J, et al. Notes  
999 from the Field: Evidence of Zika Virus Infection in Brain and Placental Tissues from Two Congenitally  
1000 Infected Newborns and Two Fetal Losses - Brazil, 2015. *MMWR Morb Mortal Wkly Rep*. 2016;65(6):159-  
1001 60.
- 1002 139. Mejia C, Johnston A, Lutz R, Arroyo J, Reynolds P. Inhibition of trophoblast invasion by the  
1003 growth arrest-specific 6 (Gas6) protein. *The FASEB Journal*. 2015;29(1 Supplement).
- 1004 140. The Human Protein Atlas [Available from: <http://www.proteinatlas.org/>.
- 1005 141. Bell TM, Field EJ, Narang HK. Zika virus infection of the central nervous system of mice. *Arch*  
1006 *Gesamte Virusforsch*. 1971;35(2):183-93.
- 1007 142. Aliota MT, Caine EA, Walker EC, Larkin KE, Camacho E, Osorio JE. Characterization of Lethal Zika  
1008 Virus Infection in AG129 Mice. *PLoS neglected tropical diseases*. 2016;10(4):e0004682.
- 1009 143. Olson JG, Ksiazek TG, Gubler DJ, Lubis SI, Simanjuntak G, Lee VH, et al. A survey for arboviral  
1010 antibodies in sera of humans and animals in Lombok, Republic of Indonesia. *Ann Trop Med Parasitol*.  
1011 1983;77(2):131-7.
- 1012 144. Lemke G, Rothlin CV. Immunobiology of the TAM receptors. *Nat Rev Immunol*. 2008;8(5):327-  
1013 36.
- 1014 145. Pierce AM, Keating AK. TAM receptor tyrosine kinases: expression, disease and oncogenesis in  
1015 the central nervous system. *Brain research*. 2014;1542:206-20.

- 1016 146. Nowakowski TJ, Pollen AA, Di Lullo E, Sandoval-Espinosa C, Bershteyn M, Kriegstein AR.  
1017 Expression Analysis Highlights AXL as a Candidate Zika Virus Entry Receptor in Neural Stem Cells. *Cell*  
1018 *Stem Cell*. 2016.
- 1019 147. Seitz HM, Camenisch TD, Lemke G, Earp HS, Matsushima GK. Macrophages and dendritic cells  
1020 use different Axl/Mertk/Tyro3 receptors in clearance of apoptotic cells. *J Immunol*. 2007;178(9):5635-  
1021 42.
- 1022 148. Prieto AL, O'Dell S, Varnum B, Lai C. Localization and signaling of the receptor protein tyrosine  
1023 kinase Tyro3 in cortical and hippocampal neurons. *Neuroscience*. 2007;150(2):319-34.
- 1024 149. Prieto AL, Weber JL, Lai C. Expression of the receptor protein-tyrosine kinases Tyro-3, Axl, and  
1025 mer in the developing rat central nervous system. *The Journal of comparative neurology*.  
1026 2000;425(2):295-314.
- 1027 150. Funakoshi H, Yonemasu T, Nakano T, Matumoto K, Nakamura T. Identification of Gas6, a  
1028 putative ligand for Sky and Axl receptor tyrosine kinases, as a novel neurotrophic factor for hippocampal  
1029 neurons. *Journal of neuroscience research*. 2002;68(2):150-60.
- 1030 151. Scutera S, Fraone T, Musso T, Cappello P, Rossi S, Pierobon D, et al. Survival and migration of  
1031 human dendritic cells are regulated by an IFN-alpha-inducible Axl/Gas6 pathway. *J Immunol*.  
1032 2009;183(5):3004-13.
- 1033 152. Fujimori T, Grabiec AM, Kaur M, Bell TJ, Fujino N, Cook PC, et al. The Axl receptor tyrosine kinase  
1034 is a discriminator of macrophage function in the inflamed lung. *Mucosal immunology*. 2015;8(5):1021-  
1035 30.
- 1036 153. Krishnan MN, Ng A, Sukumaran B, Gilfoy FD, Uchil PD, Sultana H, et al. RNA interference screen  
1037 for human genes associated with West Nile virus infection. *Nature*. 2008;455(7210):242-5.
- 1038 154. Krishnan MN, Sukumaran B, Pal U, Agaisse H, Murray JL, Hodge TW, et al. Rab 5 is required for  
1039 the cellular entry of dengue and West Nile viruses. *J Virol*. 2007;81(9):4881-5.

- 1040 155. van der Schaar HM, Rust MJ, Chen C, van der Ende-Metselaar H, Wilschut J, Zhuang X, et al.  
1041 Dissecting the cell entry pathway of dengue virus by single-particle tracking in living cells. PLoS  
1042 pathogens. 2008;4(12):e1000244.
- 1043 156. Anderson P, Kedersha N. Stress granules: the Tao of RNA triage. Trends in biochemical sciences.  
1044 2008;33(3):141-50.
- 1045 157. Anderson P, Kedersha N. RNA granules: post-transcriptional and epigenetic modulators of gene  
1046 expression. Nature reviews Molecular cell biology. 2009;10(6):430-6.
- 1047 158. Li W, Li Y, Kedersha N, Anderson P, Emara M, Swiderek KM, et al. Cell proteins TIA-1 and TIAR  
1048 interact with the 3' stem-loop of the West Nile virus complementary minus-strand RNA and facilitate  
1049 virus replication. J Virol. 2002;76(23):11989-2000.
- 1050 159. Pijlman GP, Funk A, Kondratieva N, Leung J, Torres S, van der Aa L, et al. A highly structured,  
1051 nuclease-resistant, noncoding RNA produced by flaviviruses is required for pathogenicity. Cell Host  
1052 Microbe. 2008;4(6):579-91.
- 1053 160. Tycowski KT, Guo YE, Lee N, Moss WN, Vallery TK, Xie M, et al. Viral noncoding RNAs: more  
1054 surprises. Genes & development. 2015;29(6):567-84.
- 1055 161. Schnettler E, Sterken MG, Leung JY, Metz SW, Geertsema C, Goldbach RW, et al. Noncoding  
1056 flavivirus RNA displays RNA interference suppressor activity in insect and Mammalian cells. J Virol.  
1057 2012;86(24):13486-500.
- 1058 162. Bustos-Arriaga J, Garcia-Machorro J, Leon-Juarez M, Garcia-Cordero J, Santos-Argumedo L,  
1059 Flores-Romo L, et al. Activation of the innate immune response against DENV in normal non-  
1060 transformed human fibroblasts. PLoS neglected tropical diseases. 2011;5(12):e1420.
- 1061 163. Buers I, Nitschke Y, Rutsch F. Novel interferonopathies associated with mutations in RIG-I like  
1062 receptors. Cytokine Growth Factor Rev. 2016.



- 1063 164. Crow YJ, Vanderver A, Orcesi S, Kuijpers TW, Rice GI. Therapies in Aicardi-Goutieres syndrome.  
1064 Clinical and experimental immunology. 2014;175(1):1-8.
- 1065 165. Baldwin C, Avina-Zubieta A, Rai SK, Carruthers E, De Vera MA. Disease-modifying anti-rheumatic  
1066 drug use in pregnant women with rheumatic diseases: a systematic review of the risk of congenital  
1067 malformations. Clin Exp Rheumatol. 2016;34(2):172-83.
- 1068 166. Thorbinson C, Oni L, Smith E, Midgley A, Beresford MW. Pharmacological Management of  
1069 Childhood-Onset Systemic Lupus Erythematosus. Paediatr Drugs. 2016.
- 1070 167. Magro-Checa C, Zirkzee EJ, Huizinga TW, Steup-Beekman GM. Management of Neuropsychiatric  
1071 Systemic Lupus Erythematosus: Current Approaches and Future Perspectives. Drugs. 2016;76(4):459-83.
- 1072 168. Emara MM, Brinton MA. Interaction of TIA-1/TIAR with West Nile and dengue virus products in  
1073 infected cells interferes with stress granule formation and processing body assembly. Proceedings of the  
1074 National Academy of Sciences of the United States of America. 2007;104(21):9041-6.
- 1075 169. Kedersha NL, Gupta M, Li W, Miller I, Anderson P. RNA-binding proteins TIA-1 and TIAR link the  
1076 phosphorylation of eIF-2 alpha to the assembly of mammalian stress granules. The Journal of cell  
1077 biology. 1999;147(7):1431-42.
- 1078 170. Good P, Yoda A, Sakakibara S, Yamamoto A, Imai T, Sawa H, et al. The human Musashi homolog  
1079 1 (MSI1) gene encoding the homologue of Musashi/Nrp-1, a neural RNA-binding protein putatively  
1080 expressed in CNS stem cells and neural progenitor cells. Genomics. 1998;52(3):382-4.
- 1081 171. Okano H, Kawahara H, Toriya M, Nakao K, Shibata S, Imai T. Function of RNA-binding protein  
1082 Musashi-1 in stem cells. Experimental cell research. 2005;306(2):349-56.
- 1083 172. Sakakibara S, Imai T, Hamaguchi K, Okabe M, Aruga J, Nakajima K, et al. Mouse-Musashi-1, a  
1084 neural RNA-binding protein highly enriched in the mammalian CNS stem cell. Developmental biology.  
1085 1996;176(2):230-42.

- 1086 173. MacNicol MC, Cragle CE, MacNicol AM. Context-dependent regulation of Musashi-mediated  
1087 mRNA translation and cell cycle regulation. *Cell Cycle*. 2011;10(1):39-44.
- 1088 174. Katz Y, Li F, Lambert NJ, Sokol ES, Tam WL, Cheng AW, et al. Musashi proteins are post-  
1089 transcriptional regulators of the epithelial-luminal cell state. *Elife*. 2014;3:e03915.
- 1090 175. Nishimura S, Wakabayashi N, Toyoda K, Kashima K, Mitsufuji S. Expression of Musashi-1 in  
1091 human normal colon crypt cells: a possible stem cell marker of human colon epithelium. *Dig Dis Sci*.  
1092 2003;48(8):1523-9.
- 1093 176. Bobryshev YV, Freeman AK, Botelho NK, Tran D, Levert-Mignon AJ, Lord RV. Expression of the  
1094 putative stem cell marker Musashi-1 in Barrett's esophagus and esophageal adenocarcinoma. *Dis*  
1095 *Esophagus*. 2010;23(7):580-9.
- 1096 177. Kayahara T, Sawada M, Takaishi S, Fukui H, Seno H, Fukuzawa H, et al. Candidate markers for  
1097 stem and early progenitor cells, Musashi-1 and Hes1, are expressed in crypt base columnar cells of  
1098 mouse small intestine. *FEBS Lett*. 2003;535(1-3):131-5.
- 1099 178. Sutherland JM, Siddall NA, Hime GR, McLaughlin EA. RNA binding proteins in spermatogenesis:  
1100 an in depth focus on the Musashi family. *Asian J Androl*. 2015;17(4):529-36.
- 1101 179. Choudhury NR, de Lima Alves F, de Andres-Aguayo L, Graf T, Caceres JF, Rappsilber J, et al.  
1102 Tissue-specific control of brain-enriched miR-7 biogenesis. *Genes & development*. 2013;27(1):24-38.
- 1103 180. Kayama M, Kurokawa MS, Ueda Y, Ueno H, Kumagai Y, Chiba S, et al. Transfection with pax6  
1104 gene of mouse embryonic stem cells and subsequent cell cloning induced retinal neuron progenitors,  
1105 including retinal ganglion cell-like cells, in vitro. *Ophthalmic Res*. 2010;43(2):79-91.
- 1106 181. Grillo G, Turi A, Licciulli F, Mignone F, Liuni S, Banfi S, et al. UTRdb and UTRsite (RELEASE 2010): a  
1107 collection of sequences and regulatory motifs of the untranslated regions of eukaryotic mRNAs. *Nucleic*  
1108 *Acids Res*. 2010;38(Database issue):D75-80.

- 1109 182. Katoh K, Misawa K, Kuma K, Miyata T. MAFFT: a novel method for rapid multiple sequence  
1110 alignment based on fast Fourier transform. *Nucleic Acids Res.* 2002;30(14):3059-66.
- 1111 183. Kearse M, Moir R, Wilson A, Stones-Havas S, Cheung M, Sturrock S, et al. Geneious Basic: an  
1112 integrated and extendable desktop software platform for the organization and analysis of sequence  
1113 data. *Bioinformatics.* 2012;28(12):1647-9.
- 1114 184. Zhu Z, Chan JF, Tee KM, Choi GK, Lau SK, Woo PC, et al. Comparative genomic analysis of pre-  
1115 epidemic and epidemic Zika virus strains for virological factors potentially associated with the rapidly  
1116 expanding epidemic. *Emerging microbes & infections.* 2016;5:e22.
- 1117 185. Zearfoss NR, Deveau LM, Clingman CC, Schmidt E, Johnson ES, Massi F, et al. A conserved three-  
1118 nucleotide core motif defines Musashi RNA binding specificity. *The Journal of biological chemistry.*  
1119 2014;289(51):35530-41.
- 1120 186. Miller S, Krijnse-Locker J. Modification of intracellular membrane structures for virus replication.  
1121 *Nature reviews Microbiology.* 2008;6(5):363-74.
- 1122 187. Welsch S, Miller S, Romero-Brey I, Merz A, Bleck CK, Walther P, et al. Composition and three-  
1123 dimensional architecture of the dengue virus replication and assembly sites. *Cell Host Microbe.*  
1124 2009;5(4):365-75.
- 1125 188. Mackenzie JM, Jones MK, Westaway EG. Markers for trans-Golgi membranes and the  
1126 intermediate compartment localize to induced membranes with distinct replication functions in  
1127 flavivirus-infected cells. *J Virol.* 1999;73(11):9555-67.
- 1128 189. Mackenzie JM, Jones MK, Young PR. Improved membrane preservation of flavivirus-infected  
1129 cells with cryosectioning. *Journal of virological methods.* 1996;56(1):67-75.
- 1130 190. Miller S, Kastner S, Krijnse-Locker J, Buhler S, Bartenschlager R. The non-structural protein 4A of  
1131 dengue virus is an integral membrane protein inducing membrane alterations in a 2K-regulated manner.  
1132 *The Journal of biological chemistry.* 2007;282(12):8873-82.

- 1133 191. Halstead SK, Zitman FM, Humphreys PD, Greenshields K, Verschuuren JJ, Jacobs BC, et al.  
1134 Eculizumab prevents anti-ganglioside antibody-mediated neuropathy in a murine model. *Brain*.  
1135 2008;131(Pt 5):1197-208.
- 1136 192. Miller S, Sparacio S, Bartenschlager R. Subcellular localization and membrane topology of the  
1137 Dengue virus type 2 Non-structural protein 4B. *The Journal of biological chemistry*. 2006;281(13):8854-  
1138 63.
- 1139 193. Westaway EG, Mackenzie JM, Kenney MT, Jones MK, Khromykh AA. Ultrastructure of Kunjin  
1140 virus-infected cells: colocalization of NS1 and NS3 with double-stranded RNA, and of NS2B with NS3, in  
1141 virus-induced membrane structures. *J Virol*. 1997;71(9):6650-61.
- 1142 194. Guan JL, Simon AK, Prescott M, Menendez JA, Liu F, Wang F, et al. Autophagy in stem cells.  
1143 *Autophagy*. 2013;9(6):830-49.
- 1144 195. Ward C, Martinez-Lopez N, Otten EG, Carroll B, Maetzel D, Singh R, et al. Autophagy, lipophagy  
1145 and lysosomal lipid storage disorders. *Biochimica et biophysica acta*. 2016;1864(4):269-84.
- 1146 196. Heaton NS, Randall G. Dengue virus-induced autophagy regulates lipid metabolism. *Cell Host*  
1147 *Microbe*. 2010;8(5):422-32.
- 1148 197. Heaton NS, Randall G. Dengue virus and autophagy. *Viruses*. 2011;3(8):1332-41.
- 1149 198. Lee YR, Lei HY, Liu MT, Wang JR, Chen SH, Jiang-Shieh YF, et al. Autophagic machinery activated  
1150 by dengue virus enhances virus replication. *Virology*. 2008;374(2):240-8.
- 1151 199. Cipolat Mis MS, Brajkovic S, Frattini E, Di Fonzo A, Corti S. Autophagy in motor neuron disease:  
1152 Key pathogenetic mechanisms and therapeutic targets. *Molecular and cellular neurosciences*.  
1153 2016;72:84-90.
- 1154 200. Garcia-Huerta P, Troncoso-Escudero P, Jerez C, Hetz C, Vidal RL. The intersection between  
1155 growth factors, autophagy and ER stress: A new target to treat neurodegenerative diseases? *Brain*  
1156 *research*. 2016.

- 1157 201. Vianna FS, Schuler-Faccini L, Leite JC, de Sousa SH, da Costa LM, Dias MF, et al. Recognition of  
1158 the phenotype of thalidomide embryopathy in countries endemic for leprosy: new cases and review of  
1159 the main dysmorphological findings. *Clin Dysmorphol*. 2013;22(2):59-63.
- 1160 202. Sales Luiz Vianna F, de Oliveira MZ, Sanseverino MT, Morelo EF, de Lyra Rabello Neto D, Lopez-  
1161 Camelo J, et al. Pharmacoepidemiology and thalidomide embryopathy surveillance in Brazil. *Reprod*  
1162 *Toxicol*. 2015;53:63-7.
- 1163 203. Scollard DM, Martelli CM, Stefani MM, Maroja Mde F, Villahermosa L, Pardillo F, et al. Risk  
1164 factors for leprosy reactions in three endemic countries. *Am J Trop Med Hyg*. 2015;92(1):108-14.
- 1165 204. Reveiz L, Buendia JA, Tellez D. Chemoprophylaxis in contacts of patients with leprosy: systematic  
1166 review and meta-analysis. *Rev Panam Salud Publica*. 2009;26(4):341-9.
- 1167 205. Cunha SS, Bierrenbach AL, Barreto VH. Chemoprophylaxis to Control Leprosy and the  
1168 Perspective of Its Implementation in Brazil: A Primer for Non-Epidemiologists. *Rev Inst Med Trop Sao*  
1169 *Paulo*. 2015;57(6):481-7.
- 1170

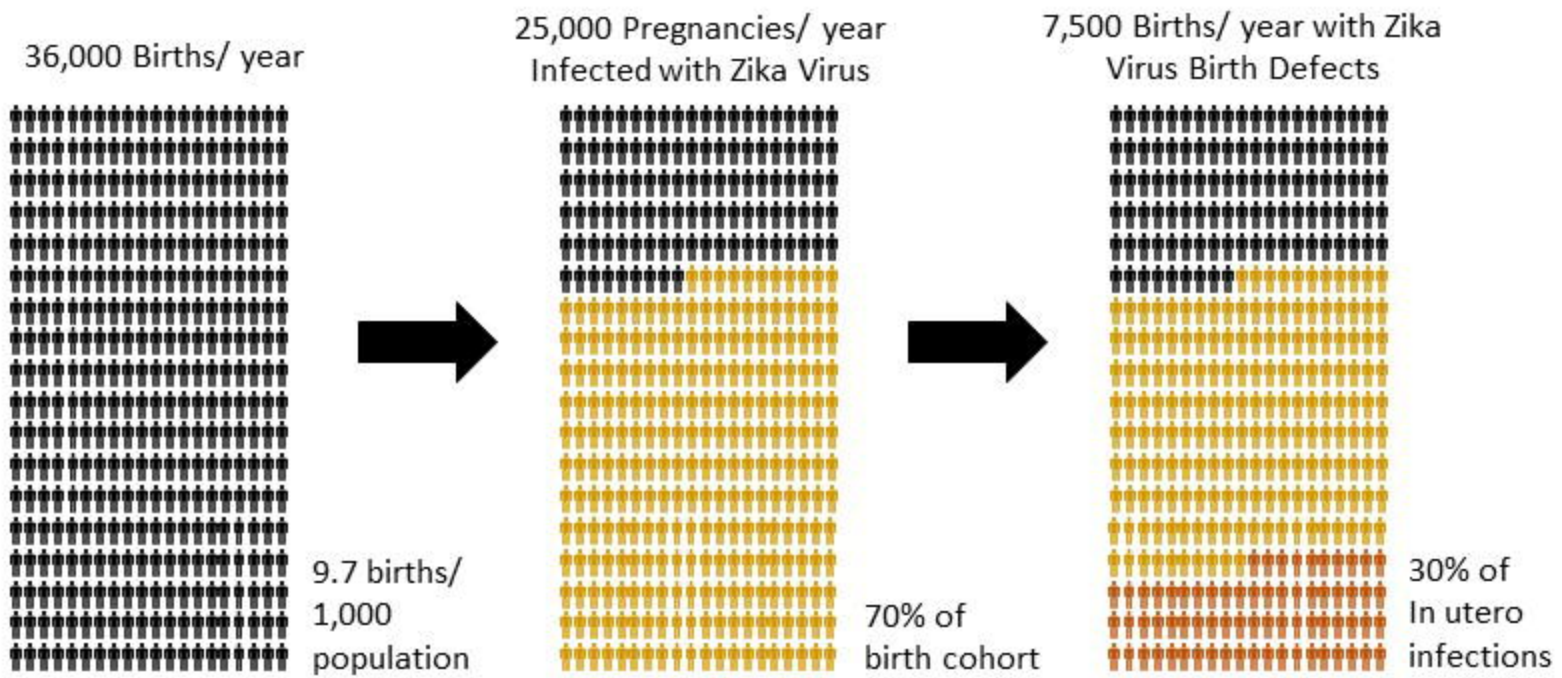



## Consensus

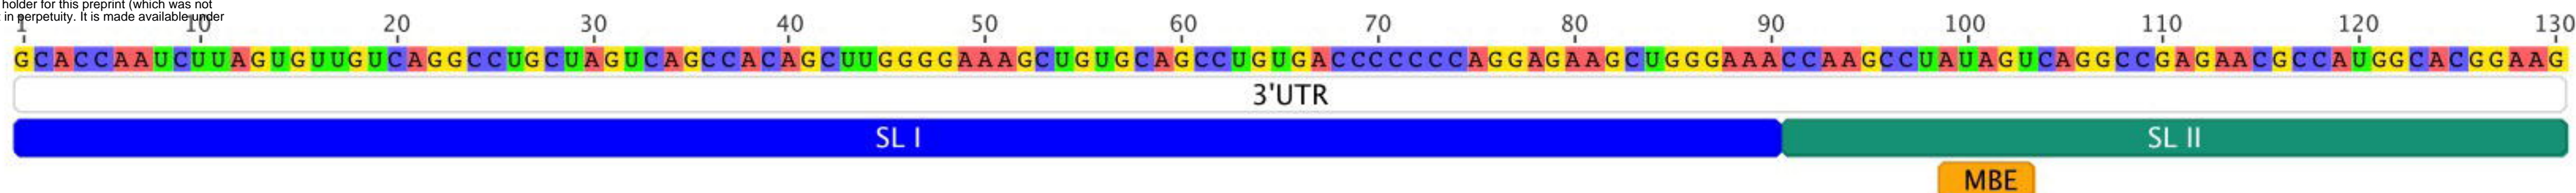

## Identity

1. KU853012.1\_Dominican\_Republic
2. KU922960.1\_Mexico
3. KU647676.1\_Martinique
4. KU509998.1\_Haiti
5. KU744693.1\_Venezuela
6. KU501215.1\_Puerto\_Rico
7. KU729217.2\_Brazil
8. KU365779.1\_Brazil
9. KU497555.1\_Brazil
10. KU820899.2\_China
11. KJ776791.1\_French\_Polynesia
12. KU681082.3\_Philippines
13. KU681081.3\_Thailand
14. KU720415.1\_Uganda
15. LC002520.1\_Uganda
16. NC\_012532.1\_Uganda
17. KF268948.1\_Central\_African\_Republic
18. KF268950.1\_Central\_African\_Republic
19. KF268949.1\_Central\_African\_Republic

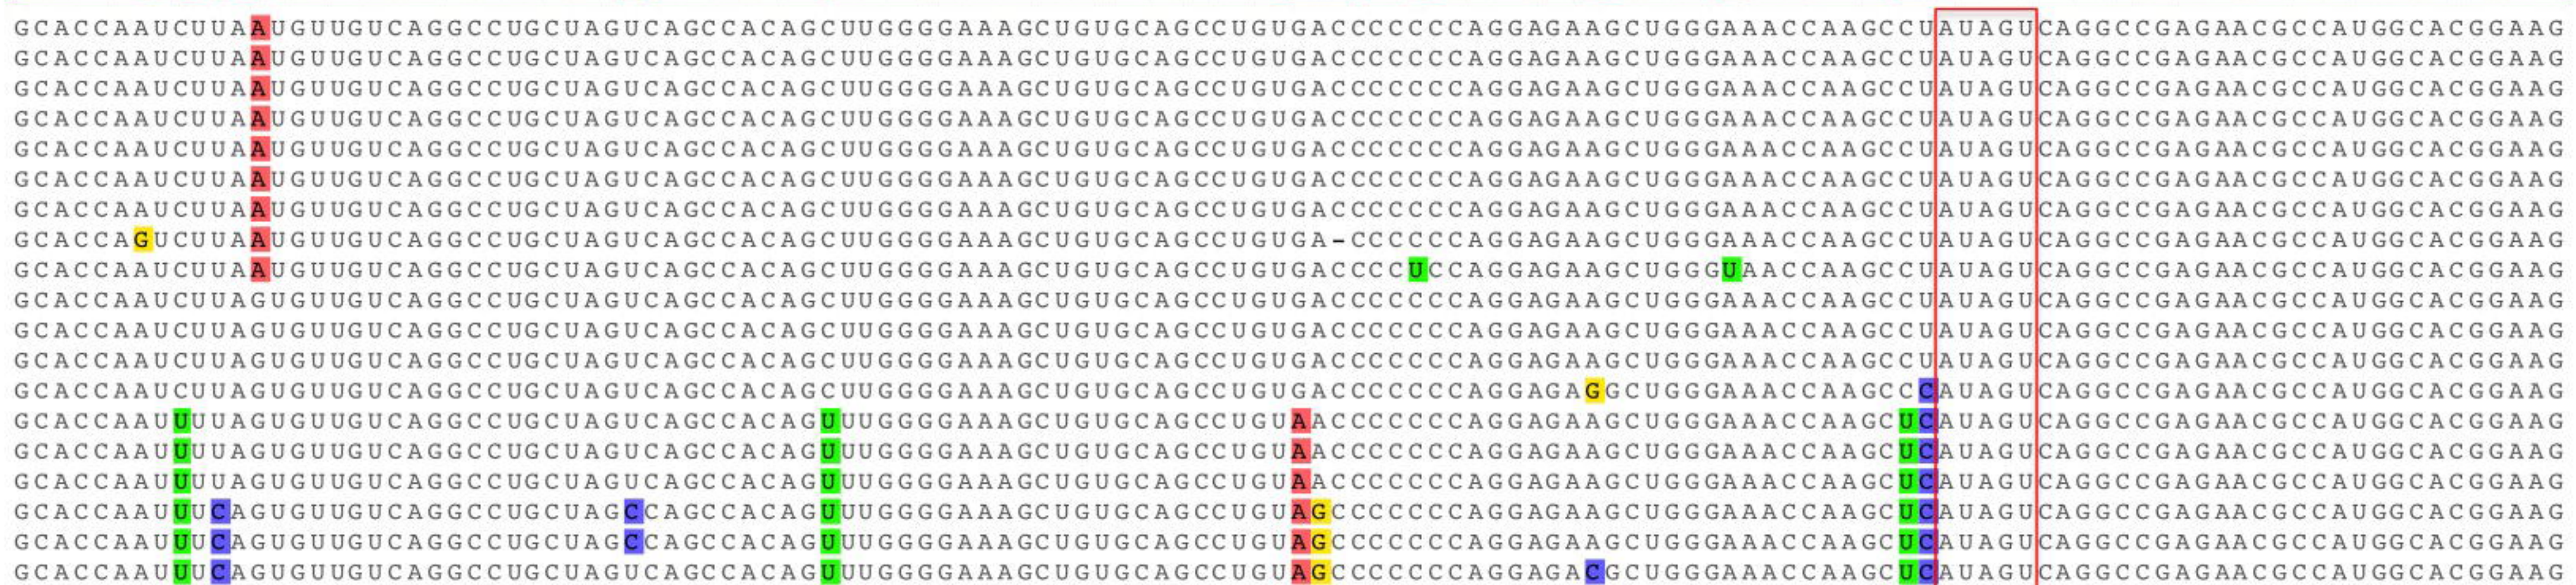

SNPs  
Pre-MBE
